# Supplementary material for: A powerful azomethine ylide route mediated by TiO2 photocatalysis for the preparation of polysubstituted imidazolidines
Source: Royal Society of Chemistry journal article supplement (doi:10.1039/d0ob02277b), 2021-01-01
Supplement: d0ob02277b1.pdf [file d0ob02277b1.pdf]

## Supporting Information

### A powerful azomethine ylide route mediated by TiO<sub>2</sub> photocatalysis for preparation of polysubstituted imidazolidines

Anan Liu,<sup>a,c</sup> Dongge Ma,<sup>\*, b</sup> Yuhang Qian,<sup>b</sup> Jundan Li,<sup>b</sup> Shan Zhai,<sup>b</sup> Yi Wang,<sup>b</sup> and  
Chuncheng Chen<sup>d</sup>

[a] Basic Experimental Center for Natural Science, University of Science and Technology Beijing, Beijing, 100083, P. R. China

[b] Department of Chemistry, College of Chemistry and Materials Engineering, Beijing Technology and Business University, Beijing, 100048, P.R. China

[c] School of Chemistry and Biological Engineering, University of Science and Technology Beijing, 30 Xueyuan Road, Beijing, 100083, P.R. China

[d] Key Laboratory of Photochemistry, Beijing National Laboratory for Molecular Sciences, Institute of Chemistry, Chinese Academy of Sciences, Beijing, 100190, P. R. China

Correspondence to: madongge@btbu.edu.cn

#### Table of Contents

- I. General Information
- II. General procedures for the preparation of  $\alpha$ -iminoester
- III. General procedures for TiO<sub>2</sub> photocatalyzed 1,3-dipolar cycloaddition of NBBA and alcohols of products 1a-1g
- IV. General procedures for TiO<sub>2</sub> photocatalyzed 1,3-dipolar cycloaddition of NBBA and alcohols of products 1h-1s
- V. Photocatalyst recycle experiments for 5 cycles and TEM images of recycled P25 TiO<sub>2</sub>
- VI. TiO<sub>2</sub> photocatalyzed 1,3-dipolar cycloaddition of NBBA and alcohols on gram scale
- VII. Optimization of reaction conditions
- VIII. Characterization data for TiO<sub>2</sub> photocatalyzed 1,3-dipolar cycloaddition of

NBBA and alcohol products

IX.  $^1\text{H}$  and  $^{13}\text{C}$  NMR spectra of all cycloaddition products

X. X-ray crystallographic data

### **I. General Information**

All reactions were performed under Ar atmospheres in oven-dried glassware with magnetic stirring. Unless otherwise stated, all reagents were purchased from commercial suppliers and used without further purification. Photochemical reactions were carried out using a HX-CFL 300W Xe lamp purchased from Au Light (Beijing) using standard Pyrex-glass bottles with sealable rubber-cap. GC and GC-MS were performed on an Agilent 7890 A equipped with a split-mode capillary injection system and Agilent 5973 network mass spec detector (MSD). Yield refers to isolated yield of analytically pure material unless otherwise noted. Thin layer chromatography (TLC) was performed on SilicaPlate 250  $\mu\text{m}$  thick silica gel plates provided by Qingdao chemicals. Column chromatography was performed using Qingdao Haiyang flash silica gel (200-300 mesh). Visualization was accomplished with short wave UV light (254 nm).  $^1\text{H}$  and  $^{13}\text{C}$  NMR spectra were recorded in  $\text{CDCl}_3$ ,  $\text{CD}_3\text{CN}$  or  $(\text{CD}_3)_2\text{CO}$  using 300 MHz, 400 MHz or 600 MHz Bruker-Avance instruments. Chemical shifts ( $\delta$ , ppm) are relative to tetramethylsilane (TMS) with the resonance of the non-deuterated solvent or TMS as the internal standard.  $^1\text{H}$  NMR data are reported as follows: chemical shift, multiplicity (s = singlet; d = doublet; q = quartet; m = multiplet), coupling constant (Hz), and integral. Data for  $^{13}\text{C}$  NMR spectra are reported in terms of chemical shift. Accurate mass measurements were performed using a Solarix mass spectrometer with electrospray ionization in positive mode. Single-crystal X-ray diffraction data were collected on a Supernova Dual Source diffractometer, equipped with an Atlas detector using Cu  $K\alpha$  radiation ( $\lambda = 1.54178 \text{ \AA}$ ). The CrysAlisPro software system was used for the data collection, cell refinement, and data reduction.

### **II. General procedures for the preparation of $\alpha$ -iminoester**

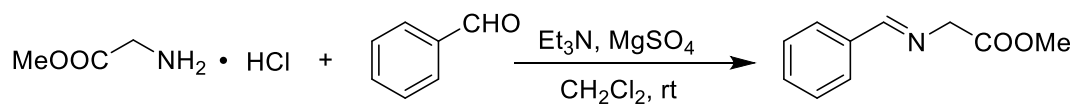

$\alpha$ -Iminoester was prepared using the reported procedure. A suspension of methyl glycinate hydrochloride (14.8 mmol),  $\text{MgSO}_4$  (14.8 mmol) and  $\text{Et}_3\text{N}$  (14.8 mmol) in dry  $\text{CH}_2\text{Cl}_2$  (36 mL) was stirred at room temperature for 1 h, and benzaldehyde (9.9 mmol) was added. After 12 h at room temperature, the mixture was filtered off and water (5 mL) was added. The organic layer was separated and the aqueous phase was extracted with  $\text{CH}_2\text{Cl}_2$  (10 mL). The combined organic layers were washed with brine, dried over  $\text{MgSO}_4$ , and evaporated under reduced pressure to afford  $\alpha$ -iminoester which was used in the next step without further purification.

### III. General procedures A for $\text{TiO}_2$ photocatalyzed 1,3-dipolar cycloaddition of N-benzylidenebenzylamine and aliphatic alcohol

A 10 mL glass vial filled with 3 mL extra-dry aliphatic alcohol, 1 mmol N-benzylidenebenzylamine (NBBA), 32 mg P25- $\text{TiO}_2$  photocatalyst was capped and magnetically stirred in front of a 300 W Xe-lamp ( $\lambda > 365$  nm). A high power axial fan was placed beside the glass vial to keep the reaction under room temperature. Once the starting material was completely consumed (monitored by TLC, petroleum ether/EtOAc=10/1), the mixture was concentrated to dryness. The residue was purified through column chromatography (petroleum ether/EtOAc =10/1-200/1) to afford the corresponding cycloaddition product. The product was analyzed by HR-ESI-MS,  $^1\text{H}$  NMR, and  $^{13}\text{C}$  NMR.

### IV. General procedures B for $\text{TiO}_2$ photocatalyzed 1,3-dipolar cycloaddition of N-benzylidenebenzylamine and aromatic alcohol

A 10 mL glass vial filled with 3 mL extra-dry acetonitrile, 3 mmol aromatic alcohol, 1 mmol N-benzylidenebenzylamine, 32 mg P25- $\text{TiO}_2$  photocatalyst was capped and magnetically stirred in front of a 300 W Xe-lamp ( $\lambda > 365$  nm). A high-power axial fan was placed beside the glass vial to keep the reaction under room temperature. Once the starting material was completely consumed (monitored by TLC, petroleum ether/EtOAc=10/1), the mixture was concentrated to dryness. The residue was purified through column chromatography (petroleum ether/EtOAc =10/1-200/1) to afford the

corresponding cycloaddition product. The product was analyzed by HR-ESI-MS,  $^1\text{H}$  NMR, and  $^{13}\text{C}$  NMR.

## V. Photocatalyst reuse experiments for 5 cycles

### 1. Photocatalyst performance for 5 cycles

For the photocatalyst stability test: after one standard reaction, the photocatalyst was separated by centrifugation, and washed by acetonitrile twice, and then dispersed in 2 mL aliphatic alcohol or acetonitrile and transferred into the photo-reactor, the following steps are the same to the procedure in the above-mentioned standard reaction condition. The cycle stability test was repeated for five times. The conversion and yield were shown in **Figure S1**.

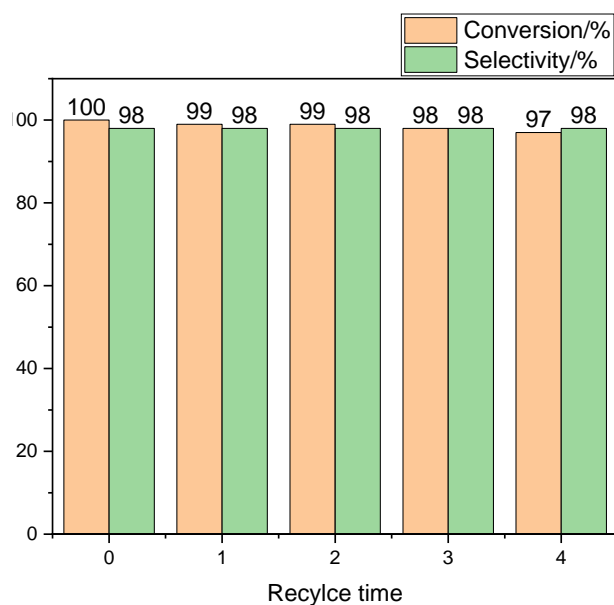

**Figure S1** Recycling of P25  $\text{TiO}_2$  photocatalyst in the 1,3-dipolar cycloaddition between ethanol and NBBA Reaction conditions: NBBA (1 mmol), ethanol (3 mL), P25  $\text{TiO}_2$  32 mg, Ar atmosphere, 300 W Xe lamp irradiation for 5 h at 5 cm.

### TEM Characterization:

The morphologies of the fresh and recycled P25  $\text{TiO}_2$  samples were investigated by microscopic technique. Powders of catalyst samples were dispersed in ethanol and drop-casted on Cu-grids. HAADF-STEM analysis was conducted on JEOL 200F transmission electron microscope with a 300 kV accelerating voltage.

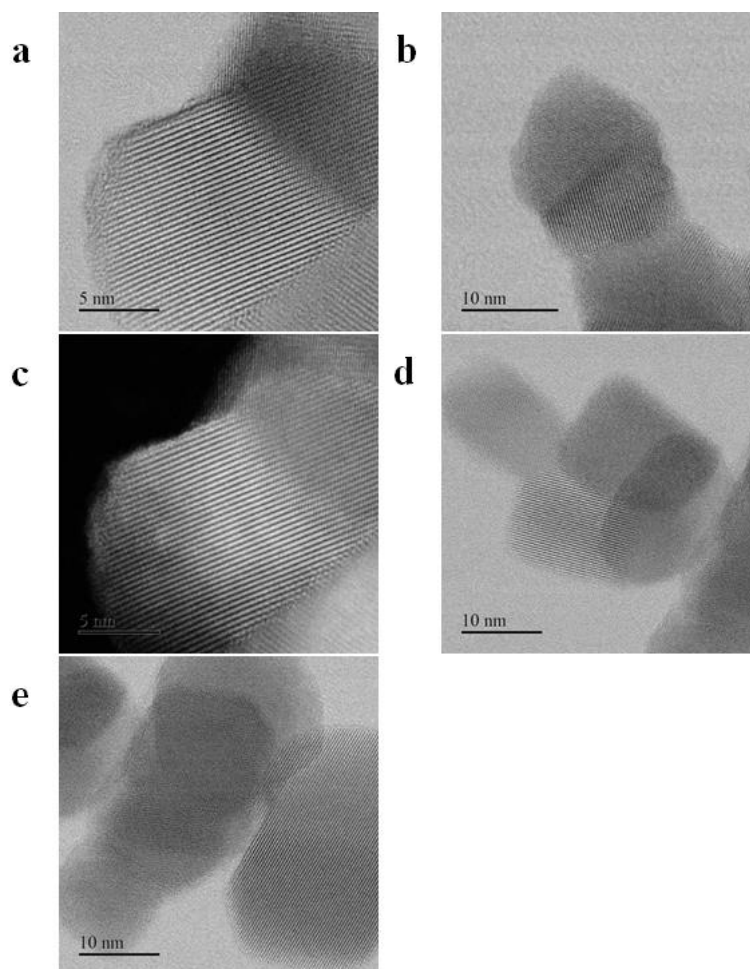

**Fig. S2.** Fresh and recycled TiO<sub>2</sub> photocatalyst HAADF-STEM images (a) HAADF-STEM image of fresh unused P25 TiO<sub>2</sub> sample indicates the lattice fringes corresponding to (101) crystal plane of anatase component, (110) crystal plane of rutile component. (b) HAADF-STEM image of P25 TiO<sub>2</sub> samples after 1 time recycle. (c) HAADF-STEM image of P25 TiO<sub>2</sub> samples after 2 times recycle.(d) HAADF-STEM image of P25 TiO<sub>2</sub> samples after 3 times recycle.(e), HAADF-STEM image of P25 TiO<sub>2</sub> samples after 4 times recycle.

#### **VI. TiO<sub>2</sub> photocatalyzed 1,3-dipolar cycloaddition of benzylidenebenzyl amine and alcohols on gram scale**

Under Ar atmosphere N-benzylidenebenzylamine (1.482 g, 7.6 mmol) and P25-TiO<sub>2</sub> (0.08g, 1 mmol) were dissolved in 10 mL of ethanol and stirred at room temperature

and irradiated with a 300 W Xe-lamp for 48 h. And then was purified through column chromatography above to give the product 1a in 91 % yield (1.45 g).

## VII. Optimization of reaction conditions

**Table S1.** TiO<sub>2</sub> photocatalytic Imidazolidine ring formation using different light source

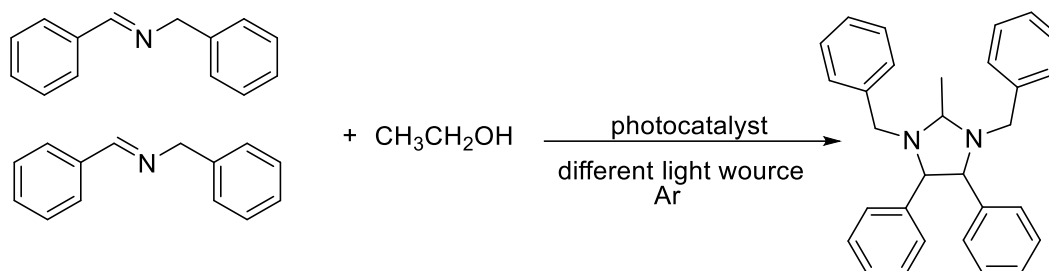

| Entry | Light source                                | Yield <sup>a</sup> (%) |
|-------|---------------------------------------------|------------------------|
| 1     | 300 W xenon lamp with<br>365 nm filter      | 98                     |
| 2     | 300 W xenon lamp with<br>420 cut-off filter | 15                     |
| 3     | 100 W 395 nm LED                            | 80                     |
| 4     | 100 W 455 nm LED                            | trace                  |

Reaction conditions: 1 mmol N-benzylidenebenzylamine, ethanol 3 ml as solvent, P25 TiO<sub>2</sub> 32 mg, Ar atmosphere under different light source illumination for 5 h at 5 cm distance. <sup>a</sup> Measured by GC.

**Table S2.** Optimization of photocatalysts for photocatalytic imidazolidine formation from ethanol and N-benzylidenebenzylamine

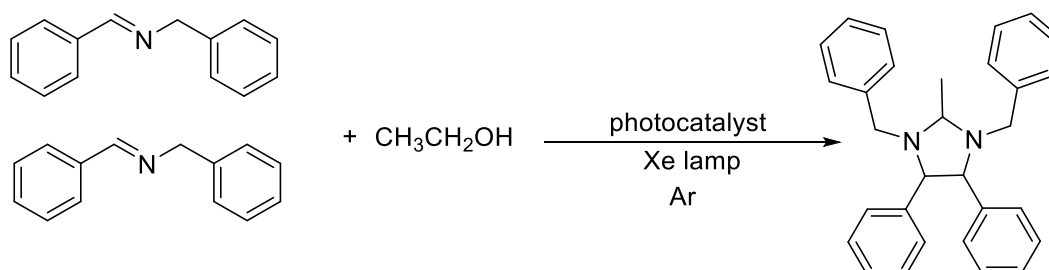

| Entry | Photocatalyst | Light Source | Time | Yield <sup>a</sup> |
|-------|---------------|--------------|------|--------------------|
|-------|---------------|--------------|------|--------------------|

|    |                                                   |                               |      |       |
|----|---------------------------------------------------|-------------------------------|------|-------|
| 1  | TiO <sub>2</sub><br>(Aeroxide<br>P25)             | Xe lamp                       | 5 h  | 98%   |
| 2  | TiO <sub>2</sub> anatase                          | Xe lamp                       | 5 h  | 95%   |
| 3  | TiO <sub>2</sub> rutile                           | Xe lamp                       | 5 h  | 38%   |
| 4  | CdS                                               | Xe lamp with<br>420 nm filter | 8 h  | trace |
| 5  | mpg-C <sub>3</sub> N <sub>4</sub> <sup>b</sup>    | Xe lamp with<br>420 nm filter | 24 h | n.d.  |
| 6  | Eosin Y                                           | Xe lamp with<br>420 nm filter | 24 h | n.d.  |
| 7  | Ru(bpy) <sub>3</sub> Cl <sub>2</sub> <sup>c</sup> | Xe lamp with<br>420 nm filter | 24 h | n.d.  |
| 8  | Ir(ppy) <sub>3</sub> <sup>c</sup>                 | Xe lamp with<br>420 nm filter | 24 h | n.d.  |
| 9  | BiVO <sub>4</sub>                                 | Xe lamp with<br>420 nm filter | 10 h | n.d.  |
| 10 | Perylene<br>bis(diimide)                          | Xe lamp with<br>420 nm filter | 24 h | n.d.  |

Reaction conditions: 1 mmol N-benzylidenebenzylamine, ethanol 3 ml as solvent, photocatalyst 0.4 eq, Ar atmosphere under illumination for a given time at 5 cm distance.

<sup>a</sup>Isolated yield after column chromatography. <sup>b</sup>37 mg mpg-C<sub>3</sub>N<sub>4</sub> photocatalyst was used.

<sup>c</sup>0.05 eq photocatalyst was used.

**Table S3.** TiO<sub>2</sub> photocatalytic Imidazolidine ring formation using different solvent for benzyl alcohol and N-benzylidenebenzylamine

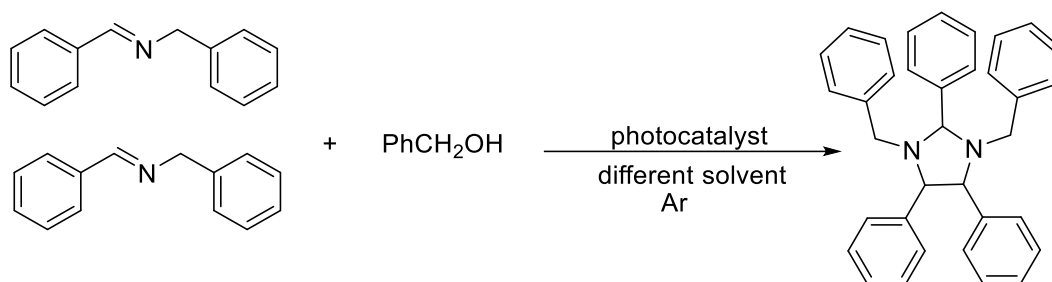

| Entry | Solvent          | Yield <sup>a</sup> (%) |
|-------|------------------|------------------------|
| 1     | ethanol          | 98                     |
| 2     | MeCN             | 75                     |
| 3     | DMF              | 45                     |
| 4     | DMSO             | 38                     |
| 5     | n-hexane         | 12                     |
| 6     | toluene          | 18                     |
| 7     | H <sub>2</sub> O | trace                  |

Reaction conditions: 1 mmol N-benzylidenebenzylamine, 3 ml solvent, P25 TiO<sub>2</sub> 32 mg, Ar atmosphere under 300 W xenon lamp illumination for 5 h at 5 cm distance.

<sup>a</sup>Measured by GC.

### VIII. Characterization data for TiO<sub>2</sub> photocatalyzed 1,3-dipolar cycloaddition of N-benzylidenebenzylamine and alcohol products

#### 1a 1,3-dibenzyl-4,5-diphenylimidazolidine

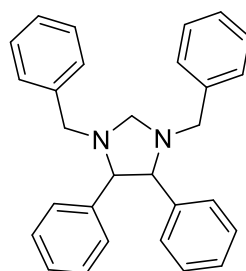

Prepared according to the general procedure A as described above in 98% yield. (monitored by TLC, petroleum ether:EtOAc=30:1,  $R_f$ = 0.40) It was purified by column chromatography (PE/EtOAc=100/1) to afford white solid. <sup>1</sup>H NMR (600 MHz, Chloroform-*d*)  $\delta$  7.40-7.08 (m, 20H), 4.26 (s, 1H), 4.24 (d, 4.2 Hz, 0.65H), 3.99 (d, 13.6 Hz, 1H), 3.95 (d, 13.6 Hz, 0.66H), 3.88 (s, 0.64H), 3.80 (s, 0.65H), 3.50 (d, 13.6 Hz,



2H), 3.27 (d, 4.2 Hz, 0.61H);  $^{13}\text{C}$  NMR (151 MHz, Chloroform-*d*)  $\delta$  139.33, 139.06, 139.01, 138.49, 128.44, 128.00, 127.72, 127.62, 127.00, 126.89, 126.41, 126.32, 126.12, 77.01, 75.41, 74.17, 71.92, 57.14, 56.49; HR-ESI-MS:  $m/z$  (ESI) calcd for  $\text{C}_{29}\text{H}_{29}\text{N}_2$  ( $\text{M}+\text{H}$ ) $^+$  405.23252, found 405.23247

**1b 1,3-dibenzyl-2-methyl-4,5-diphenylimidazolidine**

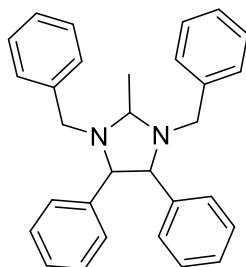

Prepared according to the general procedure A as described above in 98% yield. (monitored by TLC, petroleum ether:EtOAc=30:1,  $R_f$ = 0.38) It was purified by column chromatography (PE/EtOAc=100/1) to afford white solid.  $^1\text{H}$  NMR (600 MHz, Acetone-*d*<sub>6</sub>)  $\delta$  7.41 (d, 7.7 Hz, 2H), 7.32-7.16 (m, 18H), 4.21 (q, 5.8 Hz, 1H), 3.96 (d, 10.4 Hz, 1H), 3.88 (s, 1H), 3.87 (d, 6.2 Hz, 1H), 3.72(d, 13.4 Hz, 1H), 3.59 (d, 14.7 Hz, 1H), 3.52 (d, 14.7 Hz, 1H), 0.98 (d, 5.8 Hz, 3H);  $^{13}\text{C}$  NMR (151 MHz, Acetone-*d*<sub>6</sub>)  $\delta$  140.82, 139.76, 139.55, 139.40, 129.03, 128.36, 128.25, 128.18, 127.98, 127.94, 127.82, 127.74, 127.64, 127.23, 126.83, 126.59, 77.19, 75.06, 73.74, 57.96, 49.74, 16.93; HR-ESI-MS:  $m/z$  (ESI) calcd for  $\text{C}_{30}\text{H}_{31}\text{N}_2$  ( $\text{M}+\text{H}$ ) $^+$  419.24818, found 419.24789

**1c 1,3-dibenzyl-2-ethyl-4,5-diphenylimidazolidine**

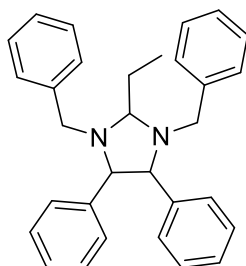

Prepared according to the general procedure A as described above in 90% yield. (monitored by TLC, petroleum ether:EtOAc=30:1,  $R_f$ = 0.38) It was purified by column chromatography (PE/EtOAc=250/1) to afford white oil.  $^1\text{H}$  NMR (600 MHz, Acetone-*d*<sub>6</sub>)  $\delta$  7.45-6.90 (m, 20H), 4.27 (q, 6.9 Hz, 1H), 4.10 (t, 7.0 Hz, 0.41 H), 4.05 (d, 3.6 Hz,

0.43H), 4.01 (d, 14.3 Hz, 0.52H), 3.93 (d, 14.9 Hz, 0.61H), 3.85 (q, 13.9 Hz, 0.36 H), 3.79 (d, 13.7 Hz, 0.47 H), 3.71 (d, 13.9 Hz, 0.62H), 3.65 (d, 14.7 Hz, 0.46H), 3.54 (t, 7.4 Hz, 0.52H), 3.43 (dd, 13.7Hz, 1H), 1.32 (m, 2H), 1.10 (d, 6.7 Hz, 1H), 0.92 (d, 6.9 Hz, 2H);  $^{13}\text{C}$  NMR (151 MHz, Acetonitrile- $d_3$ )  $\delta$  141.17, 139.91, 139.50, 139.12, 138.24, 129.76, 129.72, 129.52, 129.07, 128.55, 128.37, 128.22, 128.17, 128.11, 128.04, 128.01, 127.90, 127.86, 127.77, 127.71, 127.64, 127.39, 126.96, 126.89, 126.53, 126.30, 83.36, 82.91, 77.32, 73.96, 73.13, 58.36, 57.14, 50.11, 22.40, 13.39; HR-ESI-MS:  $m/z$  (ESI) calcd for  $\text{C}_{31}\text{H}_{33}\text{N}_2$  ( $\text{M}+\text{H}$ ) $^+$  433.26383, found 433.26389

**1d 1,3-dibenzyl-4,5-diphenyl-2-propylimidazolidine**

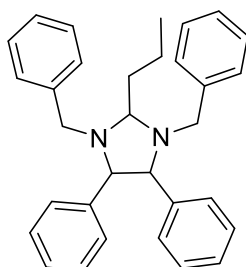

Prepared according to the general procedure A as described above in 82% yield. (monitored by TLC, petroleum ether:EtOAc=30:1,  $R_f$ = 0.37) It was purified by column chromatography (PE/EtOAc=250/1) to afford white oil.  $^1\text{H}$  NMR (600 MHz, Acetone- $d_6$ )  $\delta$  7.40-6.93 (m, 20H), 4.07 (s, 0.24H), 4.04 (d, 3.0 Hz, 0.36H), 4.23 (s, 0.24H), 4.01 (d, 8.6 Hz, 1H), 3.93 (d, 4.5 Hz, 0.74H), 3.90 (s, 0.86H), 3.80 (t, 13.7 Hz, 1.24H), 3.67 (d, 14.1 Hz, 0.42H), 3.54 (s, 2H), 1.56-1.42 (m, 2H), 0.91 (t, 7.0 Hz, 2H), 0.76 (t, 6.9 Hz, 3H);  $^{13}\text{C}$  NMR (151 MHz, Acetonitrile- $d_3$ )  $\delta$  142.83, 141.29, 140.46, 140.20, 130.35, 130.13, 130.00, 129.40, 129.23, 129.07, 128.84, 128.81, 128.58, 127.93, 127.75, 127.56, 79.77, 77.45, 75.10, 59.94, 50.43, 33.24, 19.09, 14.47; HR-ESI-MS:  $m/z$  (ESI) calcd for  $\text{C}_{32}\text{H}_{35}\text{N}_2$  ( $\text{M}+\text{H}$ ) $^+$  447.27948, found 447.27920

**1e 1,3-dibenzyl-2-heptyl-4,5-diphenylimidazolidine**

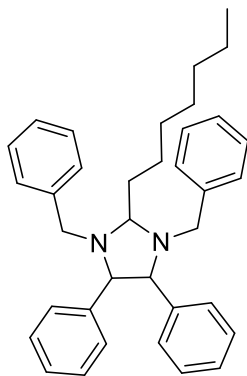

Prepared according to the general procedure A as described above in 60% yield. (monitored by TLC, petroleum ether:EtOAc=30:1,  $R_f$ = 0.39) It was purified by column chromatography (PE/EtOAc=150/1) to afford white solid.  $^1\text{H}$  NMR (400 MHz, Acetonitrile- $d_3$ )  $\delta$  7.40-6.92 (m, 20H), 4.09 (q, 7.3 Hz, 1H), 4.08 (s, 0.5H), 4.01 (dd, 8.1 Hz, 1H), 3.91 (dd, 10.2 Hz, 1H), 3.82 (d, 13.8 Hz, 0.5H), 3.77 (d, 13.9 Hz, 0.8H), 3.66 (d, 14.6Hz, 1H), 3.51 (d, 14.8 Hz, 1.6H), 1.71 (d, 4.5 Hz, 2H), 1.55-1.39 (m, 2H), 1.27-1.15(m, 8H), 0.93 (t, 8.1 Hz, 3H);  $^{13}\text{C}$  NMR (100 MHz, Acetonitrile- $d_3$ )  $\delta$  141.90, 140.82, 140.67, 140.40, 138.04, 130.66, 130.42, 129.45, 129.17, 129.11, 129.03, 128.66, 128.54, 128.29, 127.54, 127.19, 83.80, 78.22, 75.61, 75.43, 58.13, 55.59, 50.26, 32.55, 32.23, 30.28, 29.96, 23.26, 14.29; HR-ESI-MS:  $m/z$  (ESI) calcd for  $\text{C}_{36}\text{H}_{43}\text{N}_2$  ( $\text{M}+\text{H}$ ) $^+$  503.34208, found 503.34230

**1f 1,3-dibenzyl-2,2-dimethyl-4,5-diphenylimidazolidine**

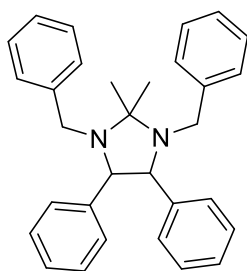

Prepared according to the general procedure A as described above in 25% yield. (monitored by TLC, petroleum ether:EtOAc=30:1,  $R_f$ = 0.35) It was purified by column chromatography (PE/EtOAc=150/1) to afford white solid.  $^1\text{H}$  NMR (600 MHz, Acetone- $d_6$ )  $\delta$  7.50-7.04 (m, 20H), 4.23 (q, 5.8 Hz, 0.44H), 4.19 (s, 1H), 4.03 (d, 8.4 Hz, 0.47H), 3.98 (d, 8.4 Hz, 0.45H), 3.94 (d, 13.4 Hz, 0.45H), 3.89 (d, 13.4 Hz, 1H), 3.80 (d, 4.5 Hz, 0.7H), 3.78 (d, 3.4 Hz, 0.5H), 3.62 (d, 9.3 Hz, 0.7H), 3.59 (d, 5.2 Hz,

0.3H), 1.40 (s, 6H);  $^{13}\text{C}$  NMR (151 MHz, Acetonitrile- $d_3$ )  $\delta$  140.94, 140.41, 139.84, 139.61, 139.53, 138.64, 129.05, 128.96, 128.41, 128.28, 128.21, 128.14, 128.09, 128.02, 127.99, 127.94, 127.71, 127.31, 126.93, 126.86, 126.66, 126.13, 81.24, 76.96, 75.75, 73.55, 70.80, 57.75, 55.24, 49.67, 22.27; HR-ESI-MS:  $m/z$  (ESI) calcd for  $\text{C}_{31}\text{H}_{33}\text{N}_2$  ( $\text{M}+\text{H}$ ) $^+$  433.26383, found 433.26389

**1g 1,3-dibenzyl-2-(tert-butyl)-4,5-diphenylimidazolidine**

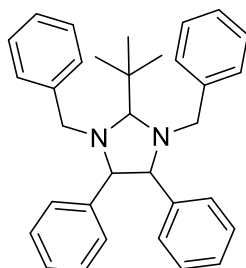

Prepared according to the general procedure A as described above in 48% yield. (monitored by TLC, petroleum ether:EtOAc=30:1,  $R_f$ = 0.34) It was purified by column chromatography (PE/EtOAc=100/1) to afford white solid.  $^1\text{H}$  NMR (400 MHz, Acetone- $d_6$ )  $\delta$  7.34-6.94 (m, 20H), 4.24 (s, 1H), 4.03 (d, 4.1 Hz, 0.5H), 3.82 (q, 13.7 Hz, 2H), 3.74 (2.6 Hz, 2H), 3.42 (d, 13.4 Hz, 1H), 3.40 (d, 13.3 Hz, 1H), 0.87 (s, 9H);  $^{13}\text{C}$  NMR (100 MHz, Acetonitrile- $d_3$ )  $\delta$  142.03, 140.77, 140.67, 140.31, 138.04, 130.66, 130.42, 129.45, 129.17, 129.11, 129.03, 128.67, 128.63, 128.54, 128.44, 128.29, 127.54, 127.19, 85.80, 75.58, 75.43, 56.27, 50.98, 32.55, 32.23, 23.26; HR-ESI-MS:  $m/z$  (ESI) calcd for  $\text{C}_{33}\text{H}_{37}\text{N}_2$  ( $\text{M}+\text{H}$ ) $^+$  461.29513, found 461.29508

**1h 1,3-dibenzyl-2,4,5-triphenylimidazolidine**

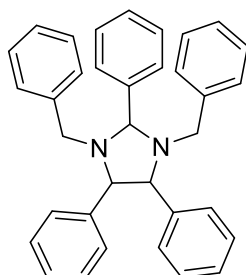

Prepared according to the general procedure B as described above in 98% yield. (monitored by TLC, petroleum ether:EtOAc=30:1,  $R_f$ = 0.32) It was purified by column chromatography (PE/EtOAc=150/1) to afford white solid.  $^1\text{H}$  NMR (300 MHz,

Acetone- $d_6$ )  $\delta$  7.60-6.97 (m, 25H), 5.13 (s, 0.60H), 4.39 (d, 4.8 Hz, 0.48H), 4.33 (d, 11.3 Hz, 0.76H), 4.18 (d, 8.0 Hz, 0.75H), 3.90-3.71 (m, 2H), 3.62 (d, 14.1 Hz, 0.48H), 3.53 (d, 15.0 Hz, 0.73H), 3.18 (d, 14.9 Hz, 0.63H);  $^{13}\text{C}$  NMR (150 MHz, Acetonitrile- $d_3$ )  $\delta$  140.76, 140.71, 140.34, 140.06, 129.80, 129.20, 129.05, 129.04, 128.94, 128.42, 128.12, 127.77, 127.71, 127.34, 78.43, 76.66, 76.25, 73.29, 58.15, 57.74; HR-ESI-MS:  $m/z$  (ESI) calcd for  $\text{C}_{35}\text{H}_{33}\text{N}_2$  ( $\text{M}+\text{H}$ ) $^+$  481.26383, found 481.26358

**1i 1,3-dibenzyl-4,5-diphenyl-2-(o-tolyl)imidazolidine**

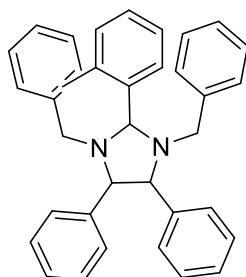

Prepared according to the general procedure B as described above in 65% yield. (monitored by TLC, petroleum ether:EtOAc=30:1,  $R_f$  = 0.31) It was purified by column chromatography (PE/EtOAc=150/1) to afford white oily solid.  $^1\text{H}$  NMR (300 MHz, Acetone- $d_6$ )  $\delta$  7.64-6.76 (m, 24H), 5.31 (dd, 6.4 Hz, 0.28H), 5.11 (dd, 9.5 Hz, 0.45H), 4.38-4.20 (m, 1H), 4.15-4.03 (m, 1H), 3.80-3.62 (m, 2H), 3.63-3.43 (m, 1H), 3.32-3.06 (m, 1H), 2.76 (s, 1H), 2.66 (s, 2H);  $^{13}\text{C}$  NMR (100 MHz, Acetonitrile- $d_3$ )  $\delta$  141.90, 140.82, 140.67, 140.40, 138.04, 130.66, 130.42, 129.46, 129.17, 129.11, 129.03, 128.67, 128.63, 128.54, 128.44, 128.29, 127.79, 127.54, 127.19, 83.72, 75.58, 75.43, 55.53, 50.98, 23.26; HR-ESI-MS:  $m/z$  (ESI) calcd for  $\text{C}_{36}\text{H}_{35}\text{N}_2$  ( $\text{M}+\text{H}$ ) $^+$  495.27948, found 495.27914

**1j 1,3-dibenzyl-4,5-diphenyl-2-(p-tolyl)imidazolidine**

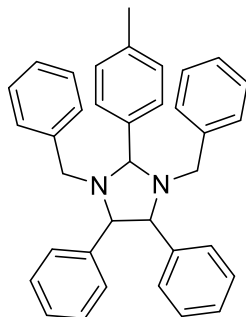

Prepared according to the general procedure B as described above in 74% yield. (monitored by TLC, petroleum ether:EtOAc=30:1,  $R_f$  = 0.21) It was purified by column

chromatography (PE/EtOAc=50/1) to afford white oily solid.  $^1\text{H}$  NMR (400 MHz, Acetonitrile- $d_3$ )  $\delta$  7.50-6.77 (m, 24H), 5.01 (q, 7.3 Hz, 0.73H), 4.32-4.14 (m, 1.31H), 4.12-4.01 (m, 0.79H), 3.76-3.58 (m, 2H), 3.55-3.37 (m, 1H), 3.13-3.03 (m, 0.75H), 2.44 (s, 1.20H), 2.33 (s, 1.61H);  $^{13}\text{C}$  NMR (100 MHz, Chloroform- $d$ )  $\delta$  141.80, 140.66, 140.53, 140.46, 130.05, 129.81, 129.25, 129.16, 129.10, 128.90, 128.86, 128.71, 128.44, 128.07, 127.96, 127.69, 127.60, 127.46, 78.15, 76.09, 74.71, 59.33, 23.58; HR-ESI-MS:  $m/z$  (ESI) calcd for  $\text{C}_{36}\text{H}_{35}\text{N}_2$  ( $\text{M}+\text{H}$ ) $^+$  495.27948, found 495.27991

**1k 1,3-dibenzyl-2-(4-methoxyphenyl)-4,5-diphenylimidazolidine**

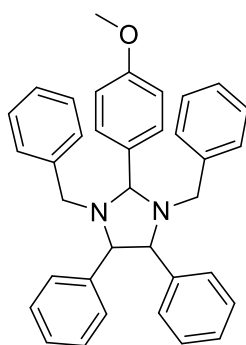

Prepared according to the general procedure B as described above in 97% yield. (monitored by TLC, petroleum ether:EtOAc=30:1,  $R_f$ = 0.20) It was purified by column chromatography (PE/EtOAc=50/1) to afford white oily solid.  $^1\text{H}$  NMR (600 MHz, Acetone- $d_6$ )  $\delta$  8.02-6.93 (m, 24H), 5.12 (d, 3.0 Hz, 0.32H), 5.08 (d, 2.8 Hz, 0.11H), 4.40-4.26 (m, 2H), 4.19-4.05 (m, 0.58H), 3.85-3.66 (m, 2H), 3.78 (s, 3H), 3.65-3.49 (m, 1.61H), 3.21-3.12 (m, 0.57H);  $^{13}\text{C}$  NMR (151 MHz, Acetonitrile- $d_3$ )  $\delta$  156.63, 141.04, 140.87, 140.77, 140.60, 140.52, 140.42, 140.35, 140.20, 140.07, 139.92, 139.80, 139.51, 139.44, 139.37, 139.32, 139.18, 139.06, 138.96, 138.87, 138.74, 138.69, 138.10, 137.09, 136.91, 136.71, 136.66, 136.52, 136.35, 136.25, 132.40, 132.10, 132.07, 131.64, 131.27, 131.21, 131.14, 131.06, 130.86, 130.41, 130.29, 130.19, 130.16, 130.13, 130.05, 129.99, 129.75, 129.61, 129.54, 129.16, 129.14, 128.65, 128.55, 128.36, 128.27, 128.23, 128.14, 127.79, 127.74, 127.66, 127.60, 127.57, 127.48, 127.41, 127.28, 127.22, 127.05, 126.99, 126.67, 126.59, 126.17, 121.85, 121.72, 121.63, 120.99, 120.94, 120.88, 120.78, 120.63, 119.61, 119.53, 119.32, 119.24, 86.16, 85.98, 85.84, 85.70, 85.62, 85.54, 83.18, 82.90, 82.65, 82.44, 75.11, 74.72, 74.54, 74.49, 74.24, 74.02, 73.95, 55.27, 55.18, 54.93, 54.80, 54.72, 54.65, 54.58, 54.52, 54.25,

54.05, 53.91, 53.76, 53.65, 53.44, 53.01, 50.35, 50.31, 50.10, 50.07; HR-ESI-MS: m/z (ESI) calcd for C<sub>36</sub>H<sub>35</sub>N<sub>2</sub>O (M+H)<sup>+</sup> 511.27439, found 511.27407

**1l 4-(1,3-dibenzyl-4,5-diphenylimidazolidin-2-yl)-N,N-dimethylaniline**

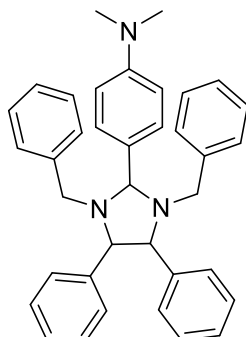

Prepared according to the general procedure B as described above in 58% yield. (monitored by TLC, petroleum ether:EtOAc=30:1,  $R_f$ = 0.22) It was purified by column chromatography (PE/EtOAc=100/1) to afford white solid. <sup>1</sup>H NMR (400 MHz, Acetonitrile-*d*<sub>3</sub>) δ 7.36-6.75 (m, 24H), 4.25-3.90 (m, 2H), 3.75-3.58 (m, 3H), 3.35-3.26 (m, 2H), 2.67 (s, 6H); <sup>13</sup>C NMR (100 MHz, Acetone-*d*<sub>6</sub>) δ 150.92, 141.37, 140.26, 140.22, 139.88, 139.58, 130.13, 130.00, 129.92, 129.45, 129.28, 128.90, 128.68, 128.58, 128.53, 128.50, 128.47, 128.44, 128.09, 128.01, 127.98, 127.97, 127.90, 127.87, 127.85, 127.75, 127.61, 127.32, 127.25, 127.18, 127.03, 126.82, 126.49, 111.27, 86.07, 83.19, 77.94, 75.76, 77.11, 75.09, 72.81, 70.09, 57.65, 57.25, 54.94, 53.81, 50.92, 50.62, 40.44; HR-ESI-MS: m/z (ESI) calcd for C<sub>37</sub>H<sub>38</sub>N<sub>3</sub> (M+H)<sup>+</sup> 524.30602, found 524.30588

**1m 1,3-dibenzyl-4,5-diphenyl-2-(4-(trifluoromethyl)phenyl)imidazolidine**

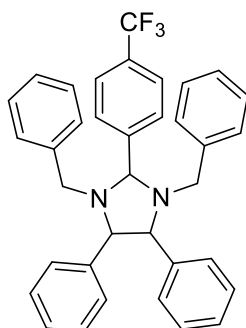

Prepared according to the general procedure B as described above in 70% yield. (monitored by TLC, petroleum ether:EtOAc=30:1,  $R_f$ = 0.20) It was purified by column chromatography (PE/EtOAc=50/1) to afford white solid. <sup>1</sup>H NMR (300 MHz,

Acetonitrile- $d_3$ )  $\delta$  7.96-6.83 (m, 24H), 5.12-5.03 (m, 0.54H), 4.40-3.97 (m, 2H), 3.75-3.66 (m, 2H), 3.58-3.39 (m, 2H), 3.11(t,  $J=3.5\text{Hz}$ , 0.54H);  $^{13}\text{C}$  NMR (151 MHz, Acetonitrile- $d_3$ )  $\delta$  145.78, 145.13, 144.76, 144.36, 144.24, 141.03, 140.83, 140.76, 140.58, 140.52, 140.42, 140.19, 139.91, 139.80, 139.49, 139.30, 139.18, 139.07, 138.99, 137.09, 137.05, 136.98, 136.82, 136.66, 136.06, 134.44, 130.15, 130.13, 129.81, 129.75, 129.61, 129.53, 129.45, 129.16, 129.11, 129.05, 128.85, 128.77, 128.57, 128.54, 128.34, 128.30, 128.26, 128.23, 128.14, 127.93, 127.82, 127.78, 127.74, 127.67, 127.65, 127.55, 127.45, 127.40, 127.24, 126.99, 126.77, 126.72, 126.65, 126.61, 126.59, 126.49, 126.47, 126.39, 126.31, 126.17, 125.06, 124.95, 124.93, 123.64, 123.49, 123.47, 85.98, 85.70, 83.59, 83.46, 83.01, 82.90, 74.72, 74.54, 74.46, 74.28, 74.14, 69.59, 69.46, 69.35, 55.20, 55.01, 54.64, 54.43, 53.44, 52.81, 50.61, 50.51, 50.10, 50.02; HR-ESI-MS:  $m/z$  (ESI) calcd for  $\text{C}_{36}\text{H}_{32}\text{F}_3\text{N}_2$  ( $\text{M}+\text{H}$ ) $^+$  549.25121, found 549.25102

**In 4-(1,3-dibenzyl-4,5-diphenylimidazolidin-2-yl)benzonitrile**

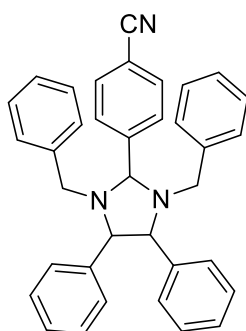

Prepared according to the general procedure B as described above in 70% yield. (monitored by TLC, petroleum ether:EtOAc=15:1,  $R_f$  = 0.20) It was purified by column chromatography (PE/EtOAc=30/1) to afford white solid.  $^1\text{H}$  NMR (400 MHz, Acetone- $d_6$ )  $\delta$  7.96-6.85 (m, 24H), 5.07 (s, 0.5H), 4.36 (s, 0.5H), 4.29-4.23 (m, 1H), 4.12 (d, 8.5 Hz, 0.5H), 3.79-3.68 (m, 1H), 3.66 (s, 0.5H), 3.57 (s, 0.5H), 3.55-3.44 (m, 1H), 3.10 (d, 14.4 Hz, 0.5H);  $^{13}\text{C}$  NMR (100 MHz, Acetone- $d_6$ )  $\delta$  141.35, 141.14, 140.40, 140.31, 140.19, 139.76, 137.24, 136.92, 134.65, 130.48, 130.12, 129.98, 129.90, 129.73, 129.43, 128.89, 128.85, 128.57, 128.49, 128.46, 128.08, 128.07, 128.00, 127.97, 127.95, 127.86, 127.84, 127.74, 127.30, 127.01, 126.90, 126.63, 126.49, 108.78, 108.21, 86.07, 83.18, 75.10, 75.08, 70.03, 54.95, 53.82, 50.64; HR-ESI-MS:  $m/z$  (ESI)



calcd for  $C_{36}H_{32}N_3$  (M+H)<sup>+</sup> 506.25907, found 506.25922

**1o 1,3-dibenzyl-2-(4-fluorophenyl)-4,5-diphenylimidazolidine**

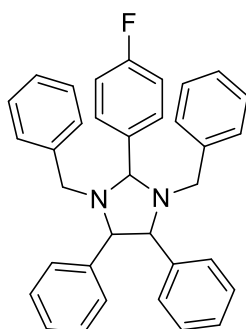

Prepared according to the general procedure B as described above in 51% yield. (monitored by TLC, petroleum ether:EtOAc=30:1,  $R_f$  = 0.18) It was purified by column chromatography (PE/EtOAc=50/1) to afford white solid. <sup>1</sup>H NMR (300 MHz, Acetonitrile-*d*<sub>3</sub>) δ 7.83-6.75 (m, 24H), 4.92 (d, 6.1 Hz, 0.67H), 4.42 (s, 0.14H), 4.21-4.08 (m, 1.43H), 4.01-3.86 (m, 0.73H), 3.66-3.46 (m, 2H), 3.46-3.28 (m, 1.26H), 2.97 (dd, 4.9 Hz, 0.67H); <sup>13</sup>C NMR (151 MHz, Acetonitrile-*d*<sub>3</sub>) δ 162.95, 161.33, 141.03, 140.76, 140.19, 140.14, 139.90, 139.79, 139.49, 137.17, 137.08, 136.98, 136.79, 136.64, 131.99, 131.93, 131.52, 131.48, 130.16, 130.00, 129.76, 129.71, 129.62, 129.53, 129.16, 129.11, 128.55, 128.51, 128.47, 128.27, 128.24, 128.15, 127.83, 127.78, 127.75, 127.65, 127.55, 127.44, 127.40, 127.05, 126.99, 126.65, 126.60, 126.56, 126.38, 126.31, 126.25, 126.18, 115.06, 114.92, 114.88, 114.83, 114.76, 114.74, 114.69, 114.62, 113.95, 113.90, 113.81, 113.76, 85.67, 85.46, 82.87, 82.36, 74.99, 74.71, 74.53, 74.41, 71.11, 69.75, 69.57, 55.06, 54.95, 54.80, 53.68, 53.40, 50.23, 50.20, 50.14, 50.11; HR-ESI-MS: m/z (ESI) calcd for  $C_{35}H_{32}FN_2$  (M+H)<sup>+</sup> 499.25440, found 499.25433

**1p 1,3-dibenzyl-2-(4-chlorophenyl)-4,5-diphenylimidazolidine**

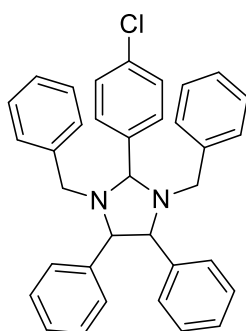

Prepared according to the general procedure B as described above in 53% yield.

(monitored by TLC, petroleum ether:EtOAc=30:1,  $R_f$ = 0.23) It was purified by column chromatography (PE/EtOAc=100/1) to afford white solid.  $^1\text{H}$  NMR (400 MHz, Acetone- $d_6$ )  $\delta$  7.48-6.86 (m, 24H), 5.08 (s, 1H), 4.32-4.22 (m, 1H), 4.14-4.02 (m, 1H), 3.81-3.61 (m, 2H), 3.61-3.44 (m, 2H);  $^{13}\text{C}$  NMR (100 MHz, Acetone- $d_6$ )  $\delta$  140.97, 140.01, 139.38, 139.26, 139.11, 136.85, 136.66, 136.54, 131.30, 131.27, 130.56, 130.10, 130.08, 129.77, 129.74, 129.72, 129.60, 129.52, 129.06, 129.03, 128.50, 128.31, 128.29, 128.24, 127.74, 127.70, 127.67, 127.64, 127.62, 127.59, 127.56, 127.50, 127.48, 127.46, 127.43, 127.39, 127.35, 126.92, 126.77, 126.67, 126.63, 126.52, 126.29, 126.24, 126.10, 83.10, 82.79, 74.71, 74.69, 74.19, 74.16, 74.11, 69.64, 54.55, 54.39, 53.43, 50.25, 50.19; HR-ESI-MS:  $m/z$  (ESI) calcd for  $\text{C}_{35}\text{H}_{32}\text{ClN}_2$  ( $\text{M}+\text{H}$ ) $^+$  515.22485, found 515.22478

**1q 1,3-dibenzyl-2-(4-bromophenyl)-4,5-diphenylimidazolidine**

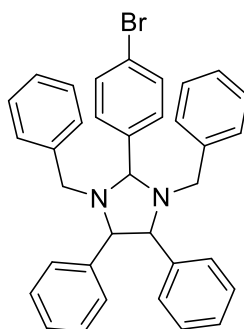

Prepared according to the general procedure B as described above in 62% yield. (monitored by TLC, petroleum ether:EtOAc=10:1,  $R_f$ = 0.21) It was purified by column chromatography (PE/EtOAc=20/1) to afford white solid.  $^1\text{H}$  NMR (600 MHz, Acetonitrile- $d_3$ )  $\delta$  7.63-6.83 (m, 24H), 5.05 (d, 3.0Hz, 0.35H), 5.00 (d, 3.0 Hz, 0.12H), 4.32-4.18 (m, 2H), 4.12-3.97 (m, 0.62H), 3.81-3.58 (m, 2H), 3.57-3.41 (m, 1.6H), 3.13-3.03 (m, 0.57H);  $^{13}\text{C}$  NMR (151 MHz, Acetonitrile- $d_3$ )  $\delta$  141.02, 140.88, 140.75, 140.58, 140.27, 140.23, 140.18, 140.09, 140.06, 139.92, 139.80, 139.52, 139.44, 139.36, 139.32, 139.18, 139.05, 138.96, 137.08, 136.91, 136.71, 136.67, 136.51, 136.35, 136.25, 135.52, 134.43, 132.39, 132.10, 132.06, 131.63, 131.25, 131.20, 131.14, 131.06, 130.41, 130.29, 130.19, 130.15, 130.13, 130.05, 129.98, 129.76, 129.72, 129.61, 129.53, 129.17, 129.14, 128.55, 128.26, 128.22, 128.14, 127.78, 127.73, 127.65, 127.59, 127.56, 127.47, 127.40, 127.05, 126.99, 126.67, 126.59, 126.35,

126.18, 122.21, 121.85, 121.75, 121.62, 121.01, 121.88, 121.76, 121.62, 119.62, 119.53, 119.34, 119.24, 85.97, 85.84, 85.70, 85.62, 85.55, 83.19, 82.91, 82.65, 82.45, 75.10, 74.72, 74.54, 74.48, 74.23, 74.03, 73.95, 73.81, 69.83, 69.60, 69.30, 69.15, 69.06, 68.94, 68.89, 54.92, 54.81, 54.64, 54.26, 54.06, 53.90, 53.76, 53.64, 53.43, 53.01, 50.32, 50.08; HR-ESI-MS:  $m/z$  (ESI) calcd for  $C_{35}H_{32}BrN_2$  ( $M+H$ )<sup>+</sup> 559.17434, found 559.16984

**1r methyl 4-(1,3-dibenzyl-4,5-diphenylimidazolidin-2-yl)benzoate**

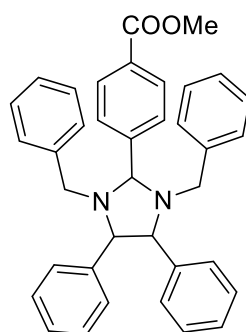

Prepared according to the general procedure B as described above in 32% yield. (monitored by TLC, petroleum ether:EtOAc=10:1,  $R_f$ =0.18) It was purified by column chromatography (PE/EtOAc=20/1) to afford white solid. <sup>1</sup>H NMR (400 MHz, Acetone-*d*<sub>6</sub>)  $\delta$  7.96-6.85 (m, 24H), 5.08 (s, 0.56H), 4.37 (s, 0.40H), 4.30-4.23 (m, 1H), 4.12 (d, 8.3 Hz, 0.76H), 3.93 (s, 3H), 3.79-3.45 (m, 3H), 3.10 (d, 14.9 Hz, 0.54H); <sup>13</sup>C NMR (100 MHz, Chloroform-*d*)  $\delta$  166.26, 145.53, 141.80, 140.66, 140.53, 140.46, 130.05, 129.81, 129.25, 129.16, 129.10, 128.90, 128.86, 128.71, 128.44, 128.07, 127.96, 127.69, 127.60, 127.46, 86.69, 78.15, 76.09, 74.71, 59.33, 50.44; HR-ESI-MS:  $m/z$  (ESI) calcd for  $C_{37}H_{35}N_2O_2$  ( $M+H$ )<sup>+</sup> 539.26930, found 539.26922

**1s 1,3-dibenzyl-2-(3,5-di-tert-butylphenyl)-4,5-diphenylimidazolidine**

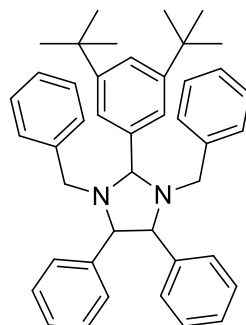

Prepared according to the general procedure B as described above in 48% yield.

(monitored by TLC, petroleum ether:EtOAc=10:1,  $R_f$ = 0.24) It was purified by column chromatography (PE/EtOAc=20/1) to afford white solid.  $^1\text{H}$  NMR (400 MHz, Acetonitrile- $d_3$ )  $\delta$  7.49-6.85(m, 23H), 5.08(s, 0.5H), 5.04(s, 0.5H), 4.40-4.17(m, 1H), 4.16-3.99(m, 1H), 3.98-3.76(m, 1H), 3.76-3.67(m, 1H), 3.67-3.43(m, 2H), 1.29(s, 9H), 1.25(s, 9H)  $^{13}\text{C}$  NMR (75 MHz, Acetone- $d_6$ )  $\delta$  152.15, 141.22, 140.22, 138.00, 137.19, 137.11, 130.11, 129.91, 129.70, 129.42, 128.99, 128.88, 128.84, 128.57, 128.50, 128.47, 128.42, 128.10, 128.07, 128.00, 127.97, 127.73, 127.33, 127.31, 127.02, 126.78, 126.63, 124.27, 124.06, 84.41, 83.08, 75.04, 54.85, 50.71, 50.60, 34.59, 31.29

HR-ESI-MS:  $m/z$  (ESI) calcd for  $\text{C}_{43}\text{H}_{49}\text{N}_2$  ( $\text{M}+\text{H}$ ) $^+$  593.38903, found 593.38912

**1t 1,3-bis(4-methoxybenzyl)-4,5-diphenylimidazolidine**

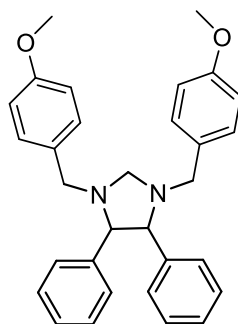

Prepared according to the general procedure B as described above in 78% yield. (monitored by TLC, petroleum ether:EtOAc=50:1,  $R_f$ = 0.24) It was purified by column chromatography (PE/EtOAc=50/1) to afford white solid.  $^1\text{H}$  NMR (400 MHz,  $\text{CDCl}_3$ )  $\delta$  7.99-6.82(m, 18H), 5.05(t, 0.31H), 4.99(s, 6H), 4.78-4.82(d, 0.34H), 4.62-4.67 (d, 0.53H), 4.35-4.23 (m, 0.58H), 4.21-4.07 (m, 0.64H), 4.03-3.95 (dd, 0.23H), 3.73-3.60 (m, 1.16H), 3.53-3.41 (m, 0.85H), 3.16-3.10 (m, 0.30H) HR-ESI-MS:  $m/z$  (ESI) calcd for  $\text{C}_{31}\text{H}_{33}\text{N}_2\text{O}_2$  ( $\text{M}+\text{H}$ ) $^+$  464.24638, found 464.24632.

**1u 4,4'-(2-methyl-4,5-diphenylimidazolidine-1,3-diyl)bis(methylene)dibenzonitrile**

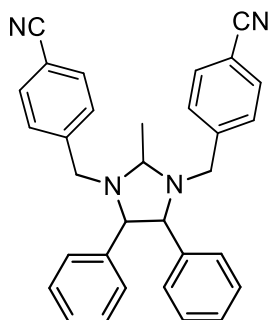

Prepared according to the general procedure B as described above in 62% yield.

(monitored by TLC, petroleum ether:EtOAc=30:1,  $R_f$  = 0.21) It was purified by column chromatography (PE/EtOAc=30/1) to afford white solid.  $^1\text{H}$  NMR (400 MHz,  $\text{CD}_3\text{OD}$ )  $\delta$  7.91-6.84(m, 18H), 4.99(s, 0.28H), 4.70-4.62(t, 0.28H), 4.27-4.00 (m, 1.36H), 3.73-3.60 (m, 1.01H), 3.51-3.41 (m, 0.72H), 3.30 (q, 2.26H), 3.05-3.01 (d, 0.39H), 0.89-0.86 (d, 3H) HR-ESI-MS:  $m/z$  (ESI) calcd for  $\text{C}_{32}\text{H}_{29}\text{N}_4$  ( $\text{M}+\text{H}$ ) $^+$  468.23140, found 468.23136.

3c

Prepared according to the general procedure B as described above in 92% yield. (monitored by TLC, petroleum ether:EtOAc=50:1,  $R_f$  = 0.24) It was purified by column chromatography (PE/EtOAc=50/1) to afford white solid.  $^1\text{H}$  NMR (400 MHz, Acetone- $d_6$ )  $\delta$  7.68-7.34(m, 10H), 5.09(d, 0.47H), 4.71(s, 0.28H), 4.48 (d, 0.68H), 4.08 (d, 0.66H), 3.77(s, 1.58H), 3.71-3.60 (m, 2.45H), 3.51 (s, 1.38H), 2.09-2.05 (m, 5H), 1.11 (d, 3H);  $^{13}\text{C}$ -NMR (100 MHz, acetone- $d_6$ )  $\delta$  169.51, 165.39, 144.44, 140.82, 130.50, 130.08, 129.10, 128.93, 128.85, 128.68, 128.45, 128.36, 128.12, 128.04, 127.21, 83.55, 76.77, 68.80, 51.53, 51.18, 47.46, 46.81, 22.43; HR-ESI-MS:  $m/z$  (ESI) calcd for  $\text{C}_{22}\text{H}_{27}\text{N}_2\text{O}_4$  ( $\text{M}+\text{H}$ ) $^+$  382.18926, found 382.18929.

# IX. $^1\text{H}$ NMR and $^{13}\text{C}$ NMR spectra of all cycloaddition products

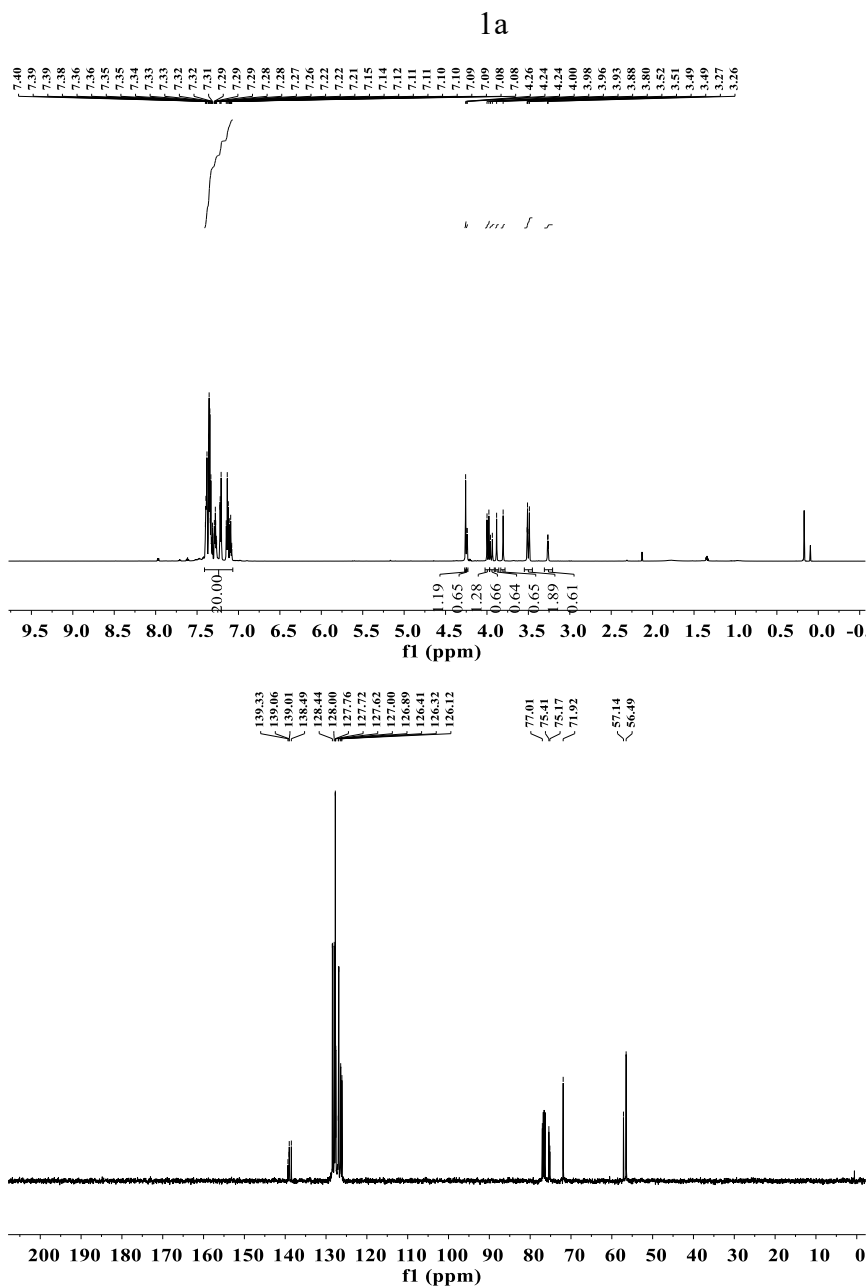

1b

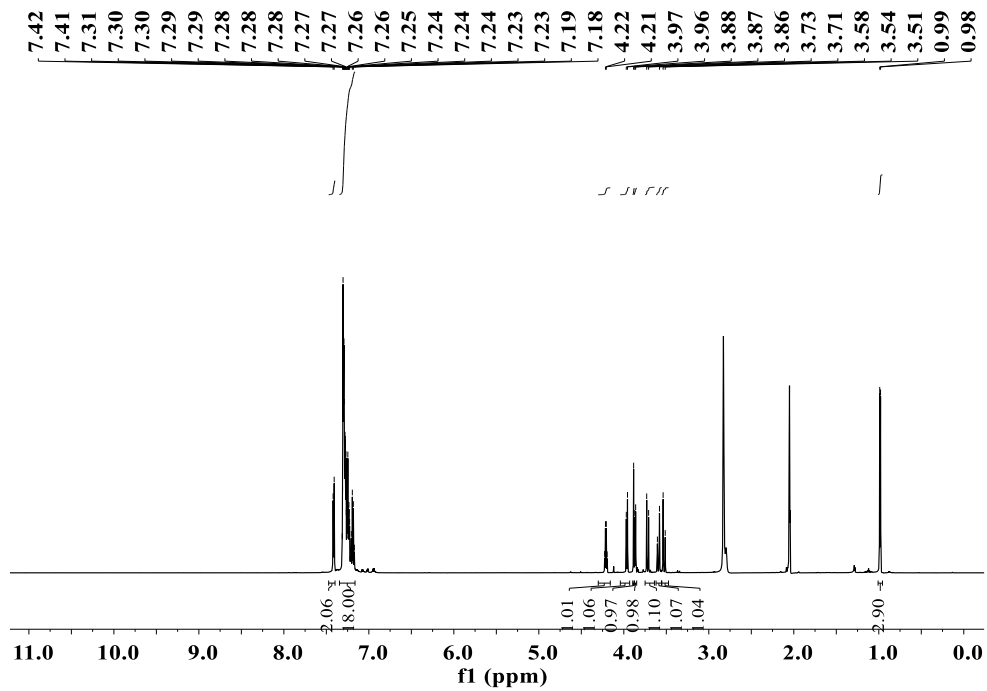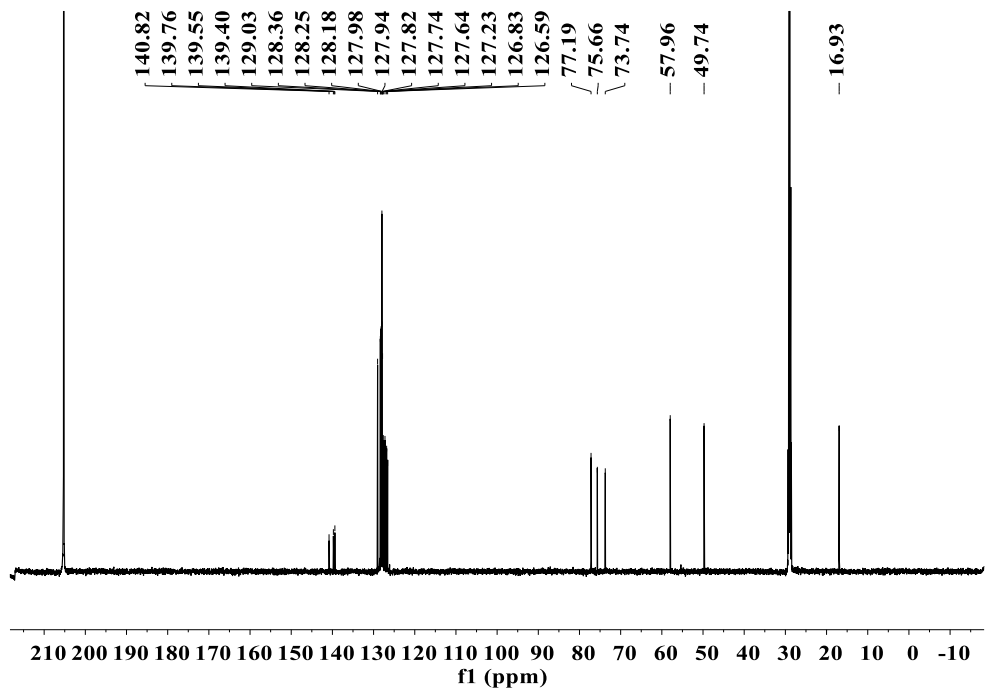

1c

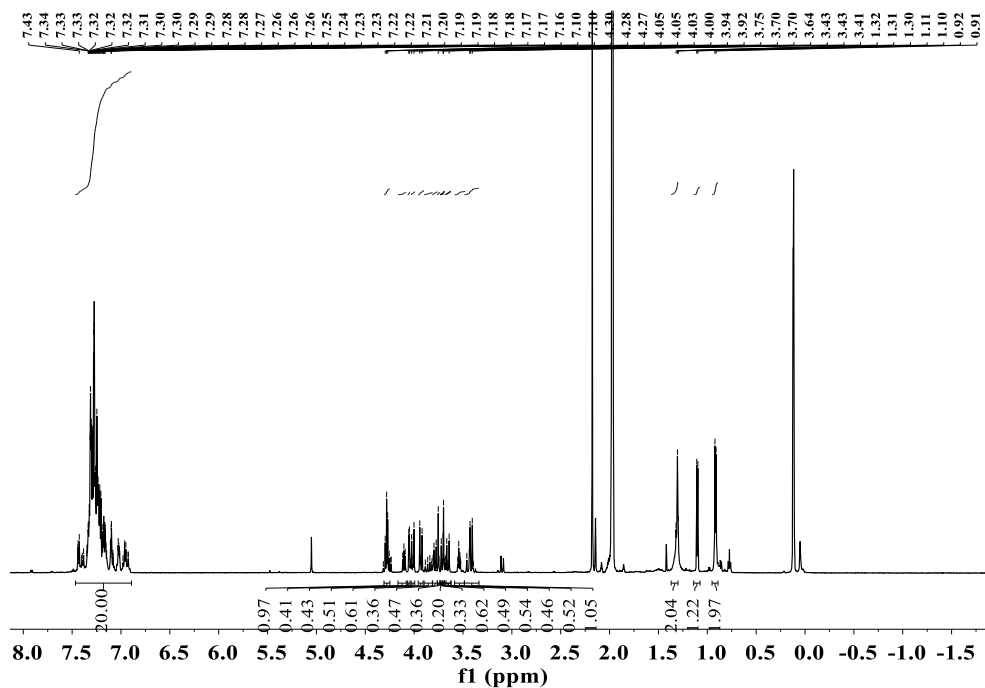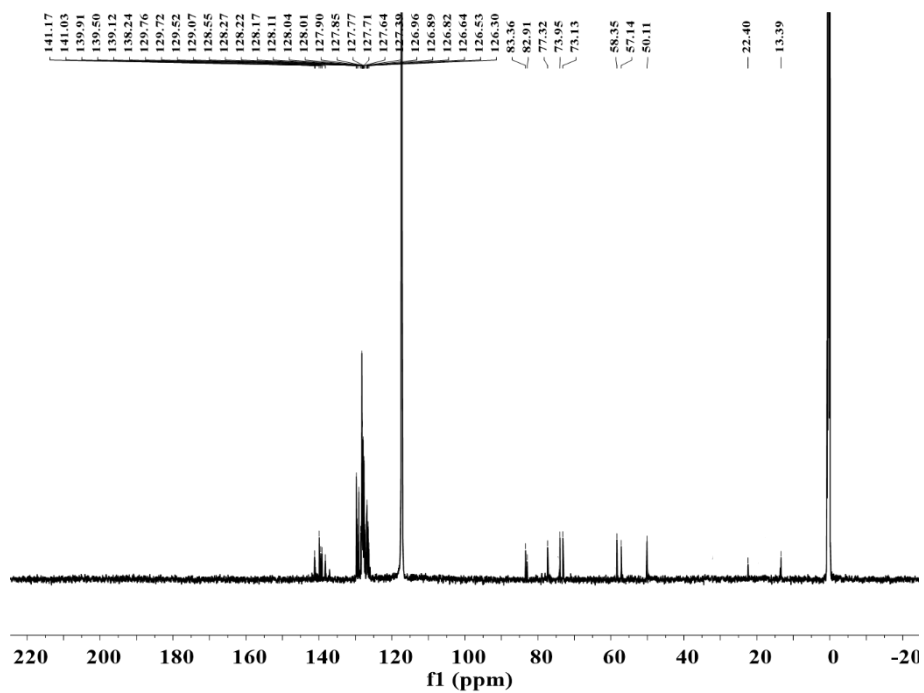



1d

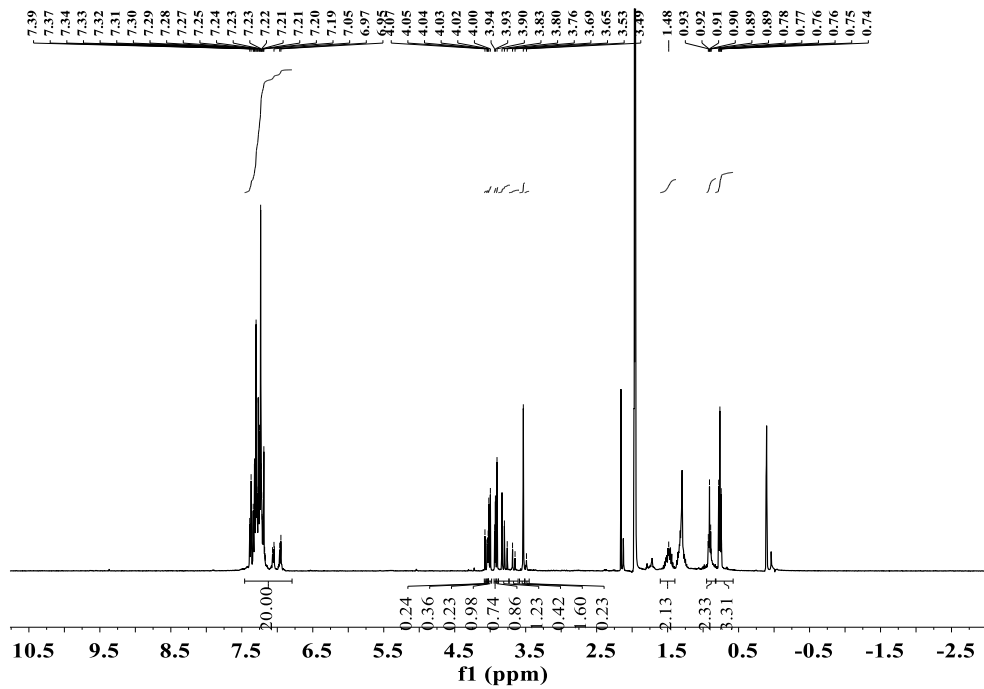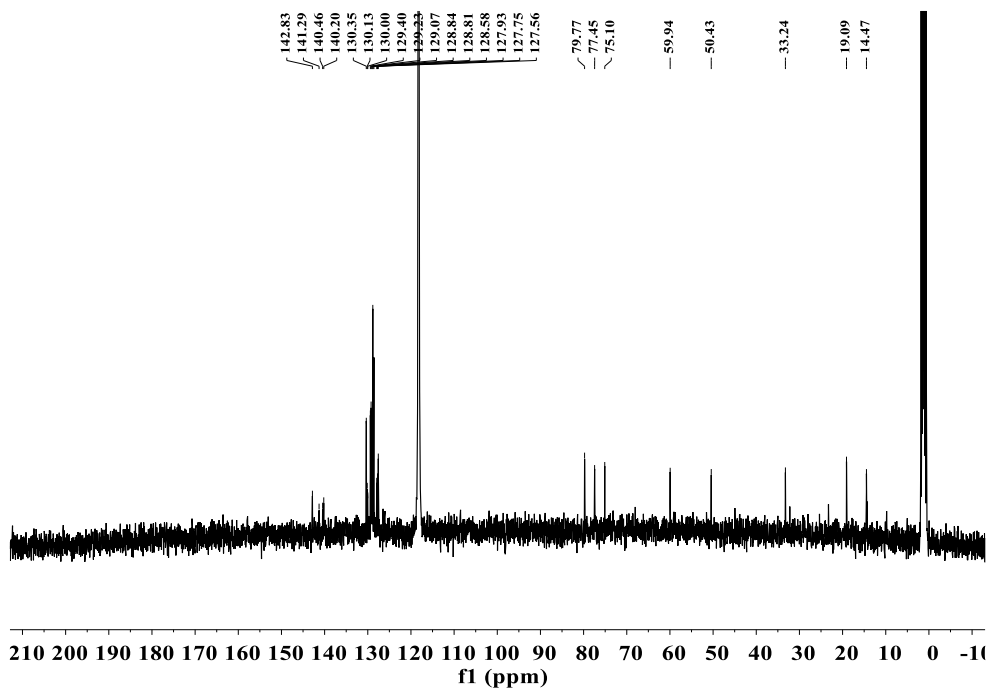

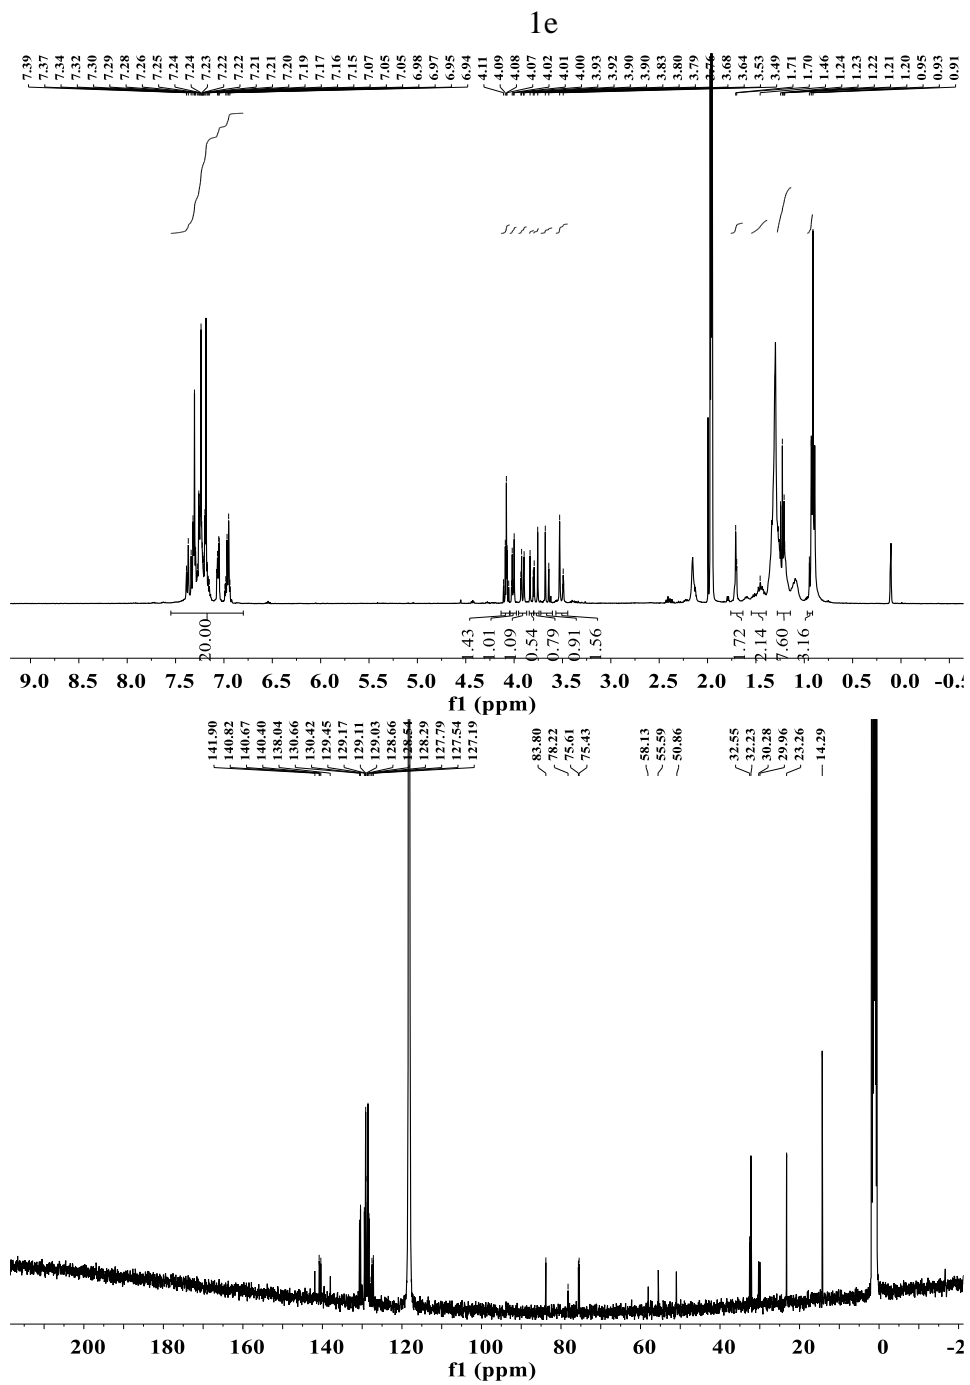

1f

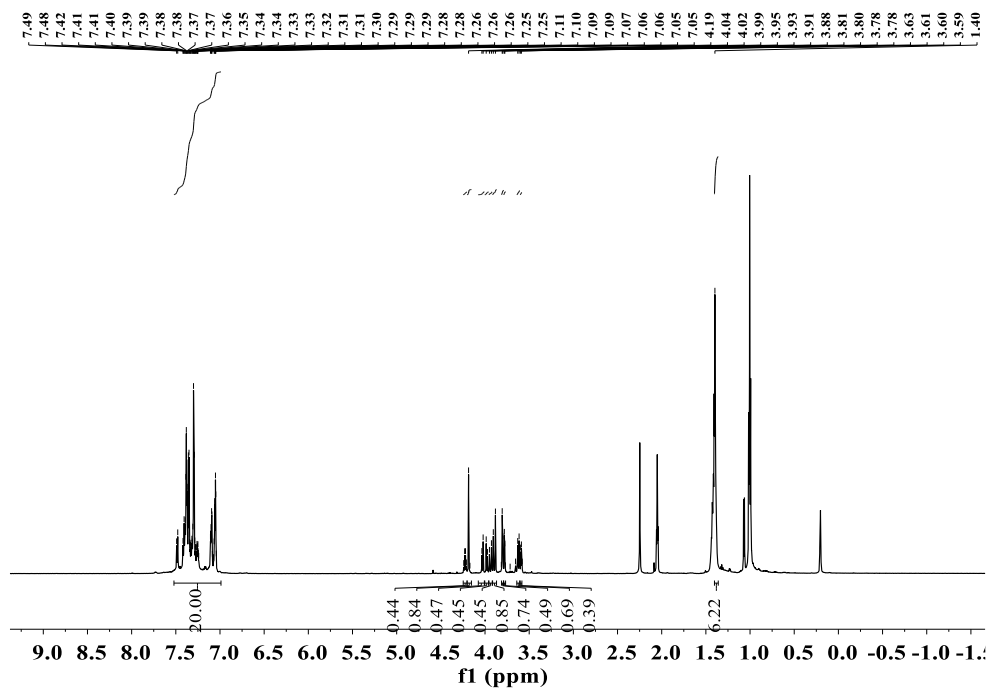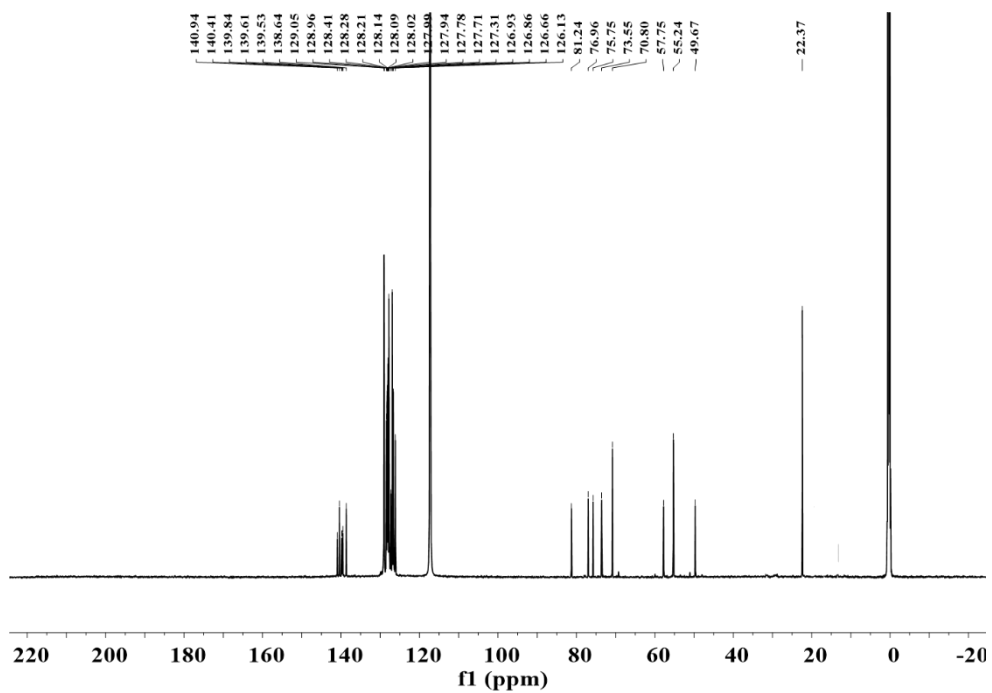

lg

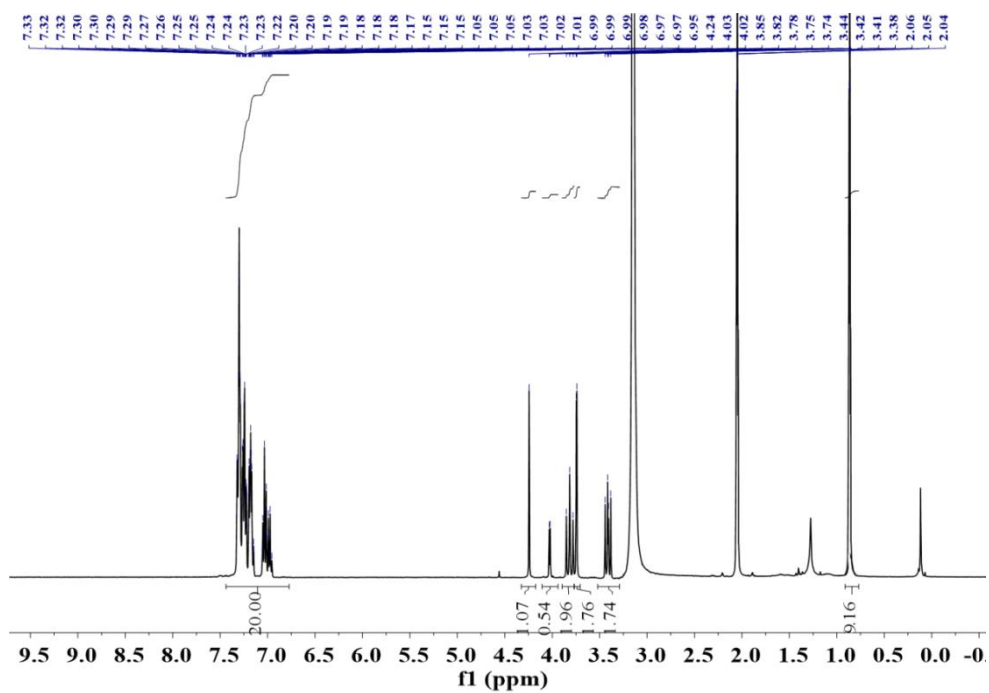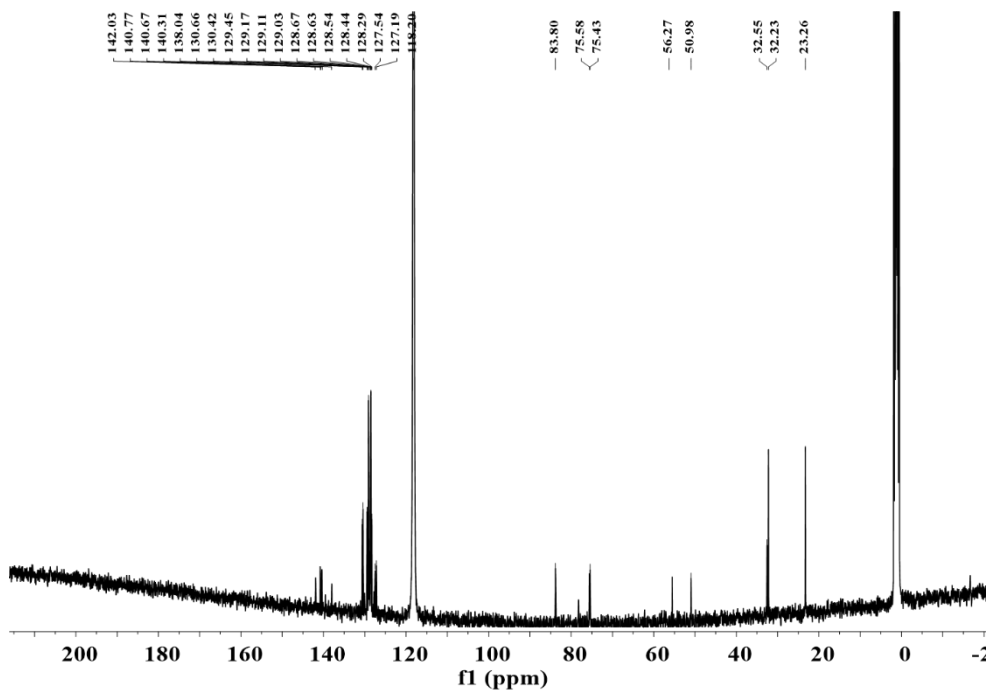

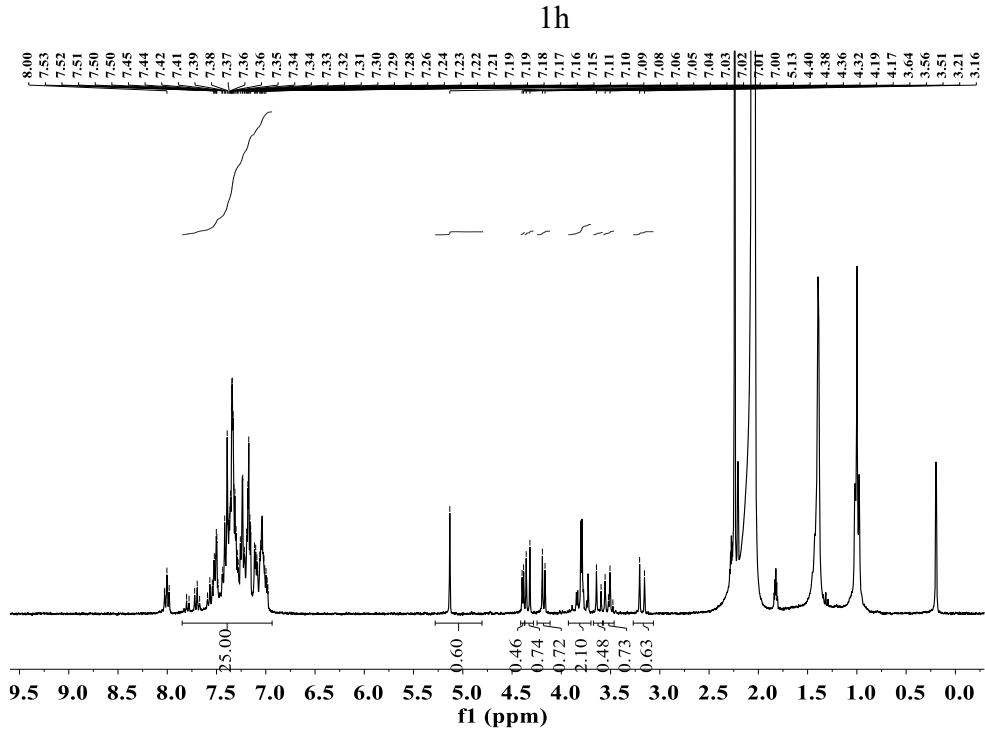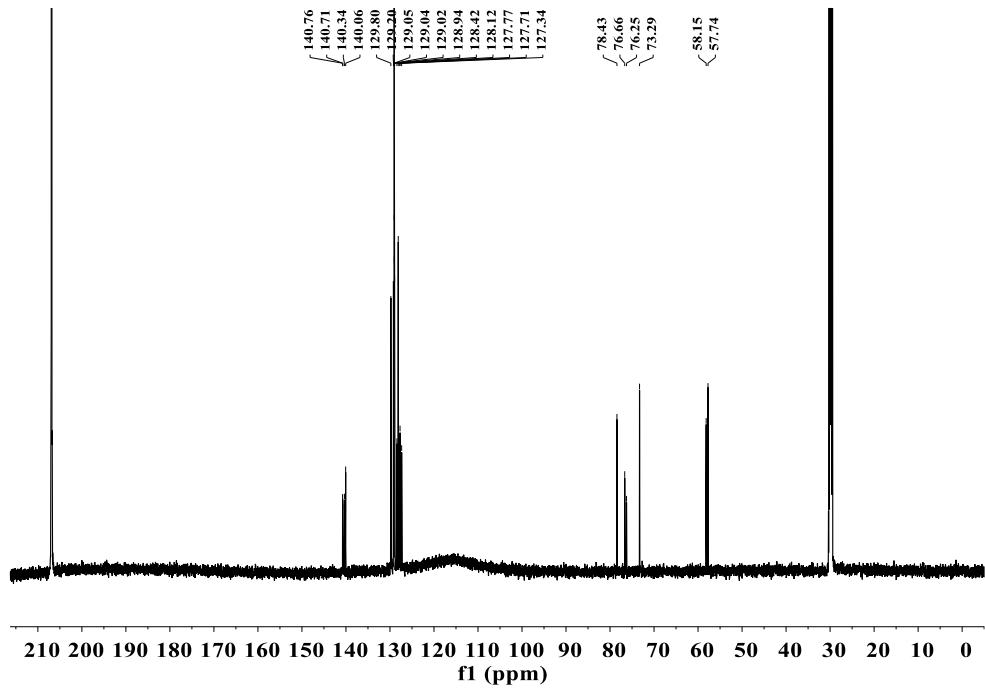

li

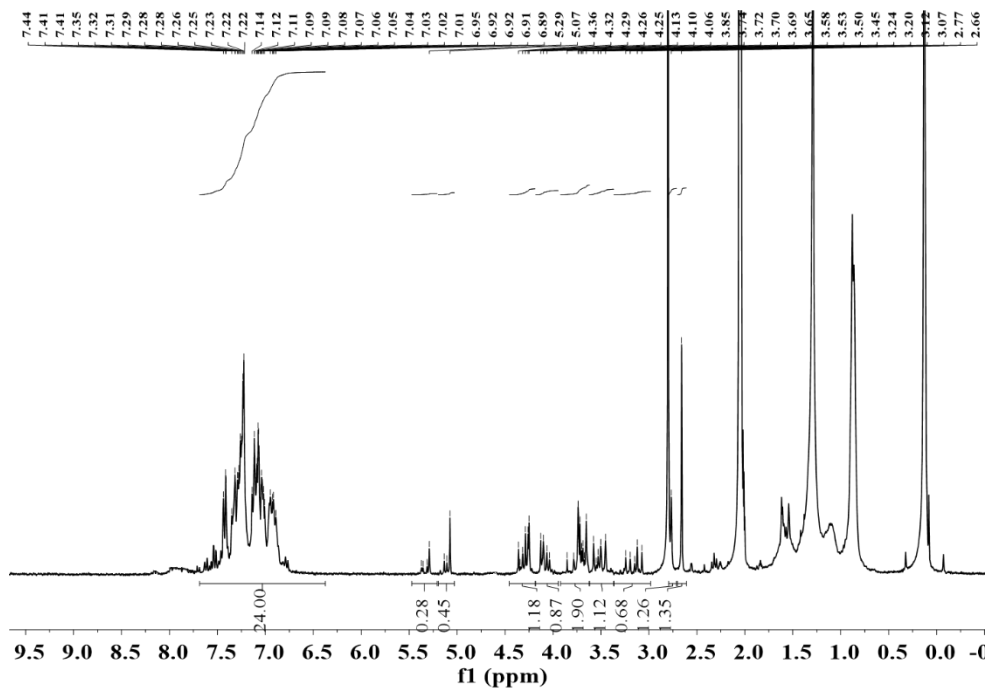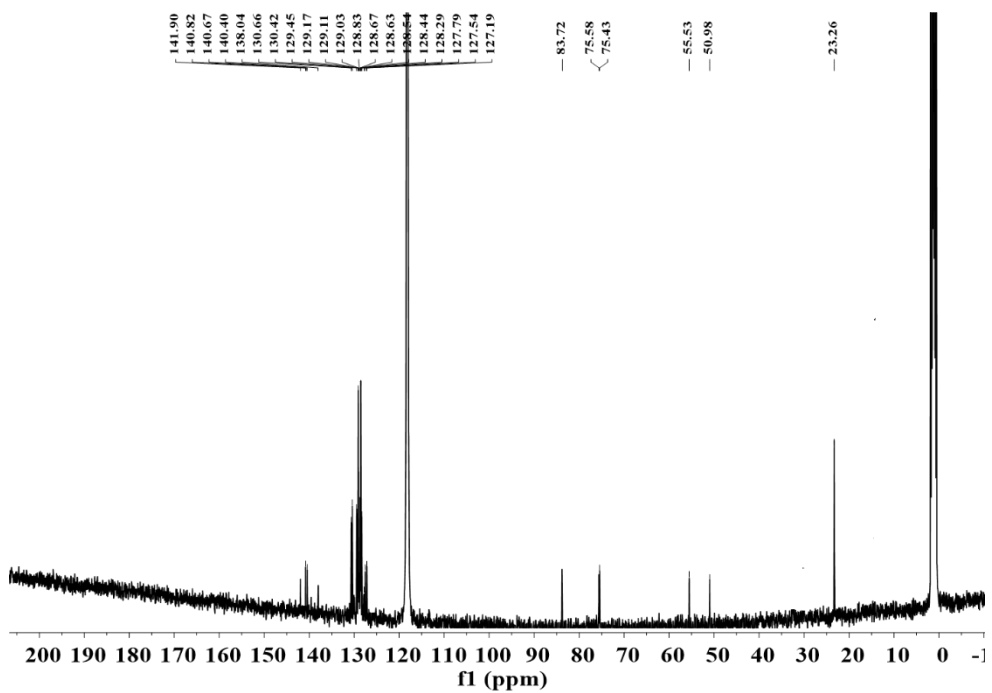

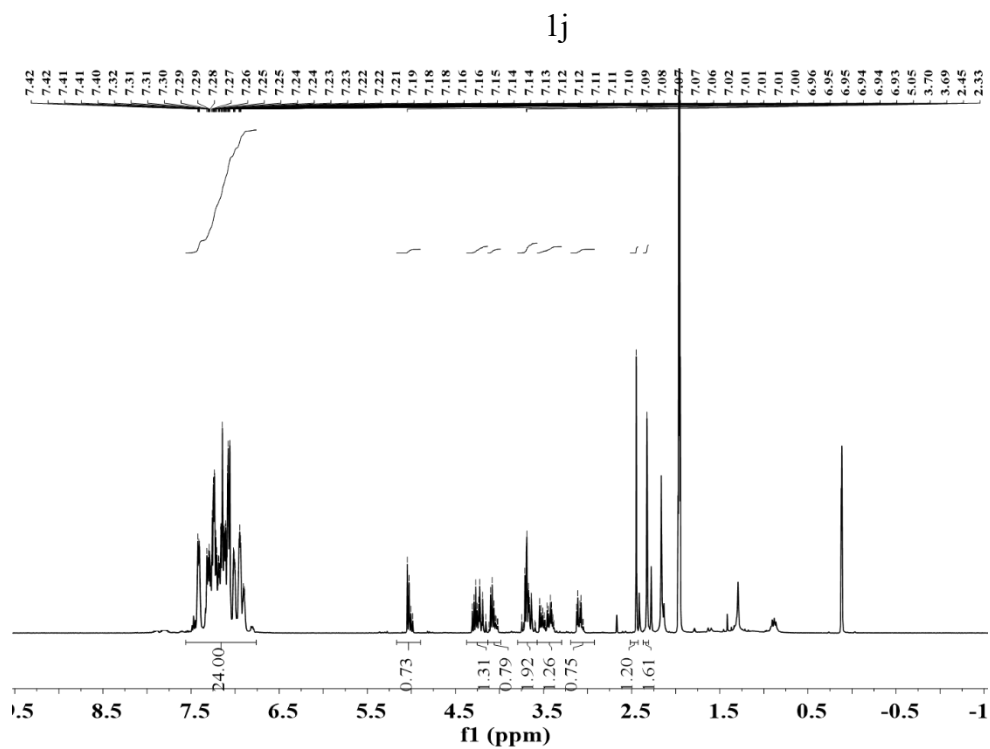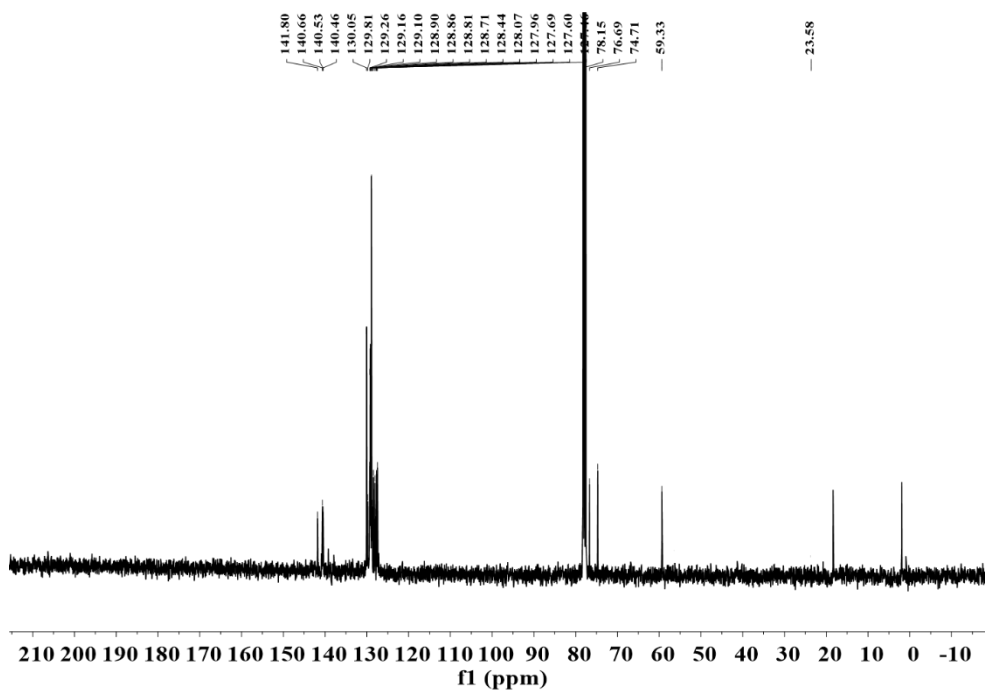

1k

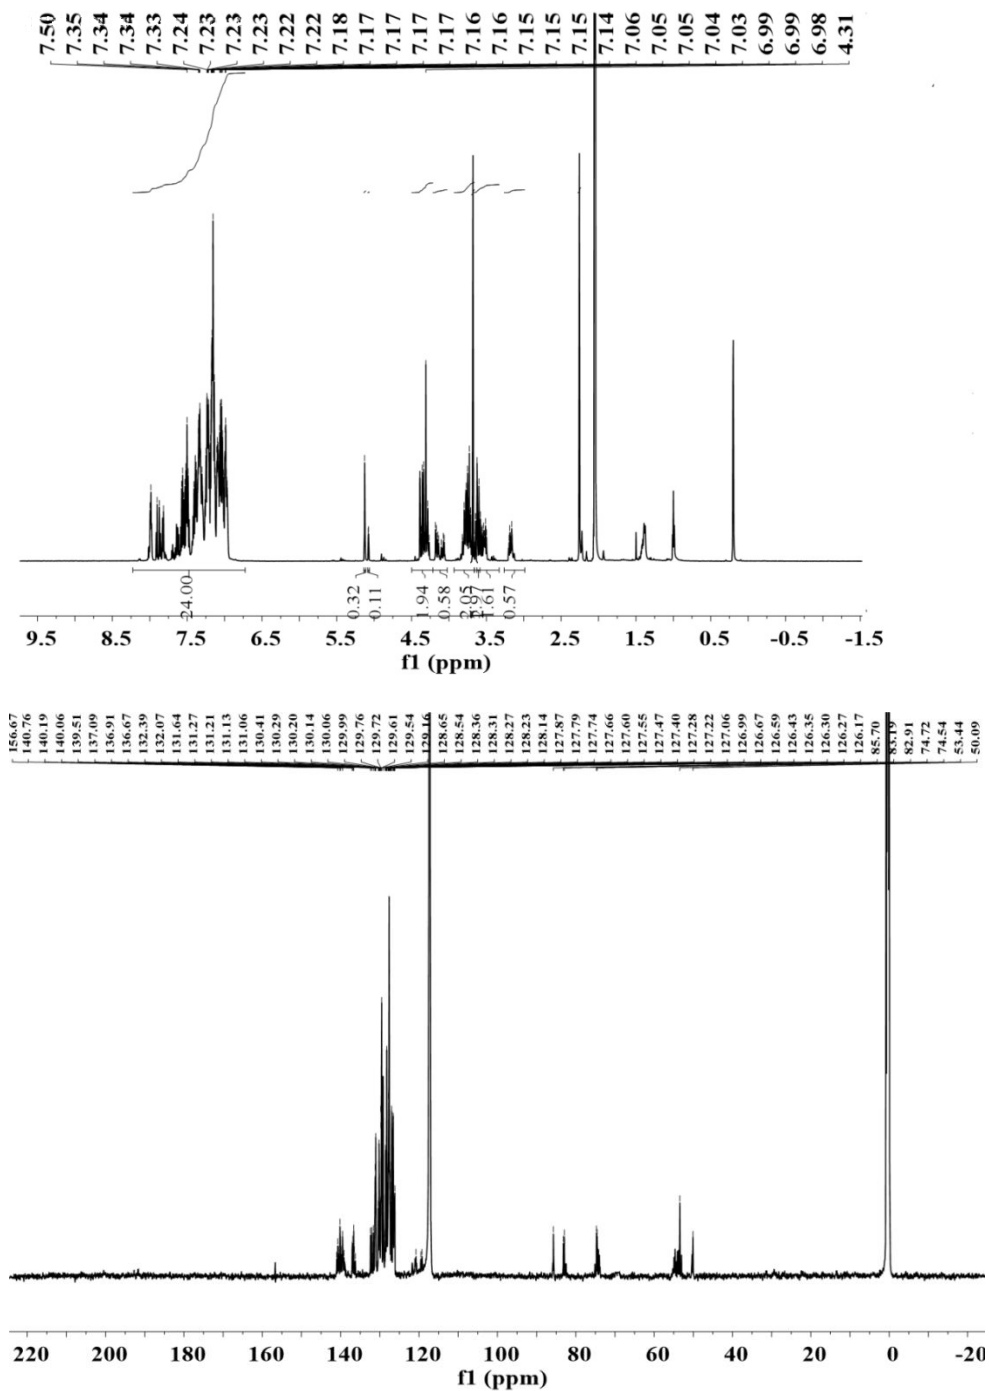



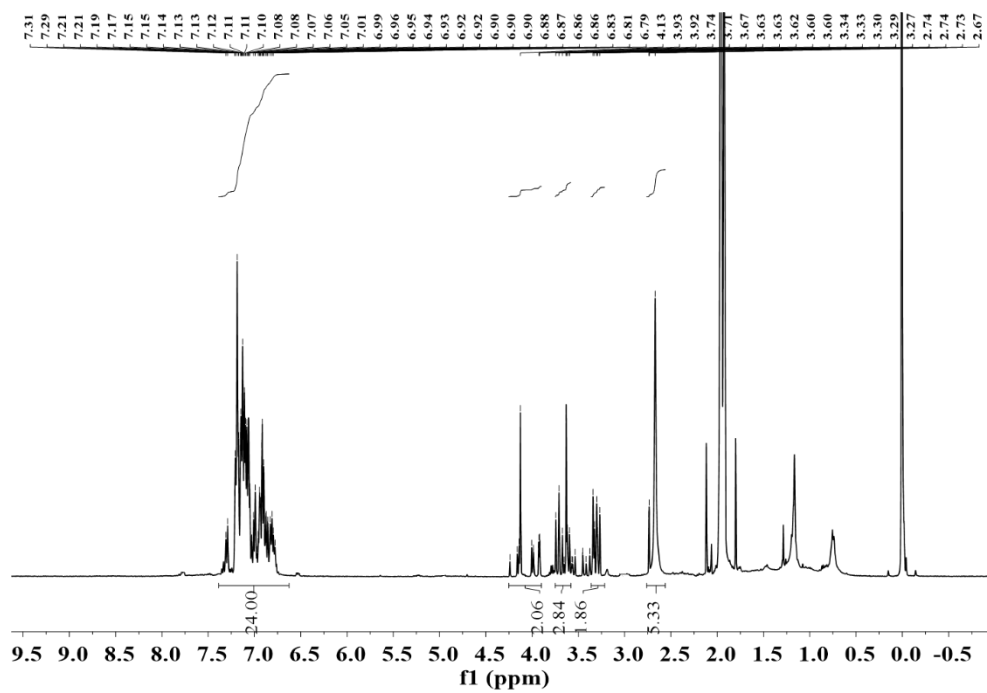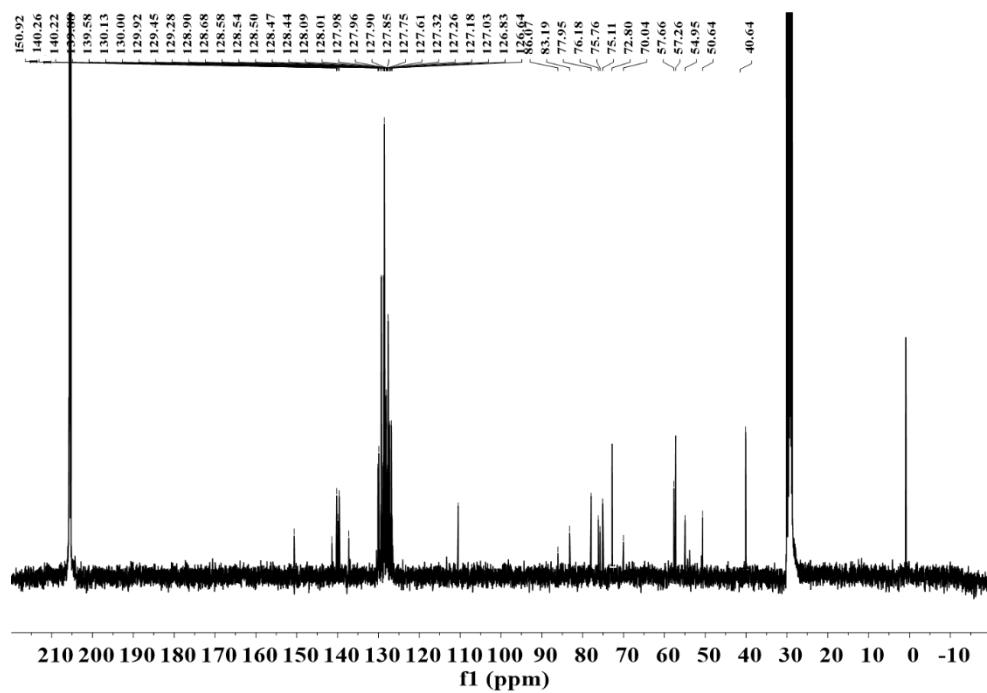

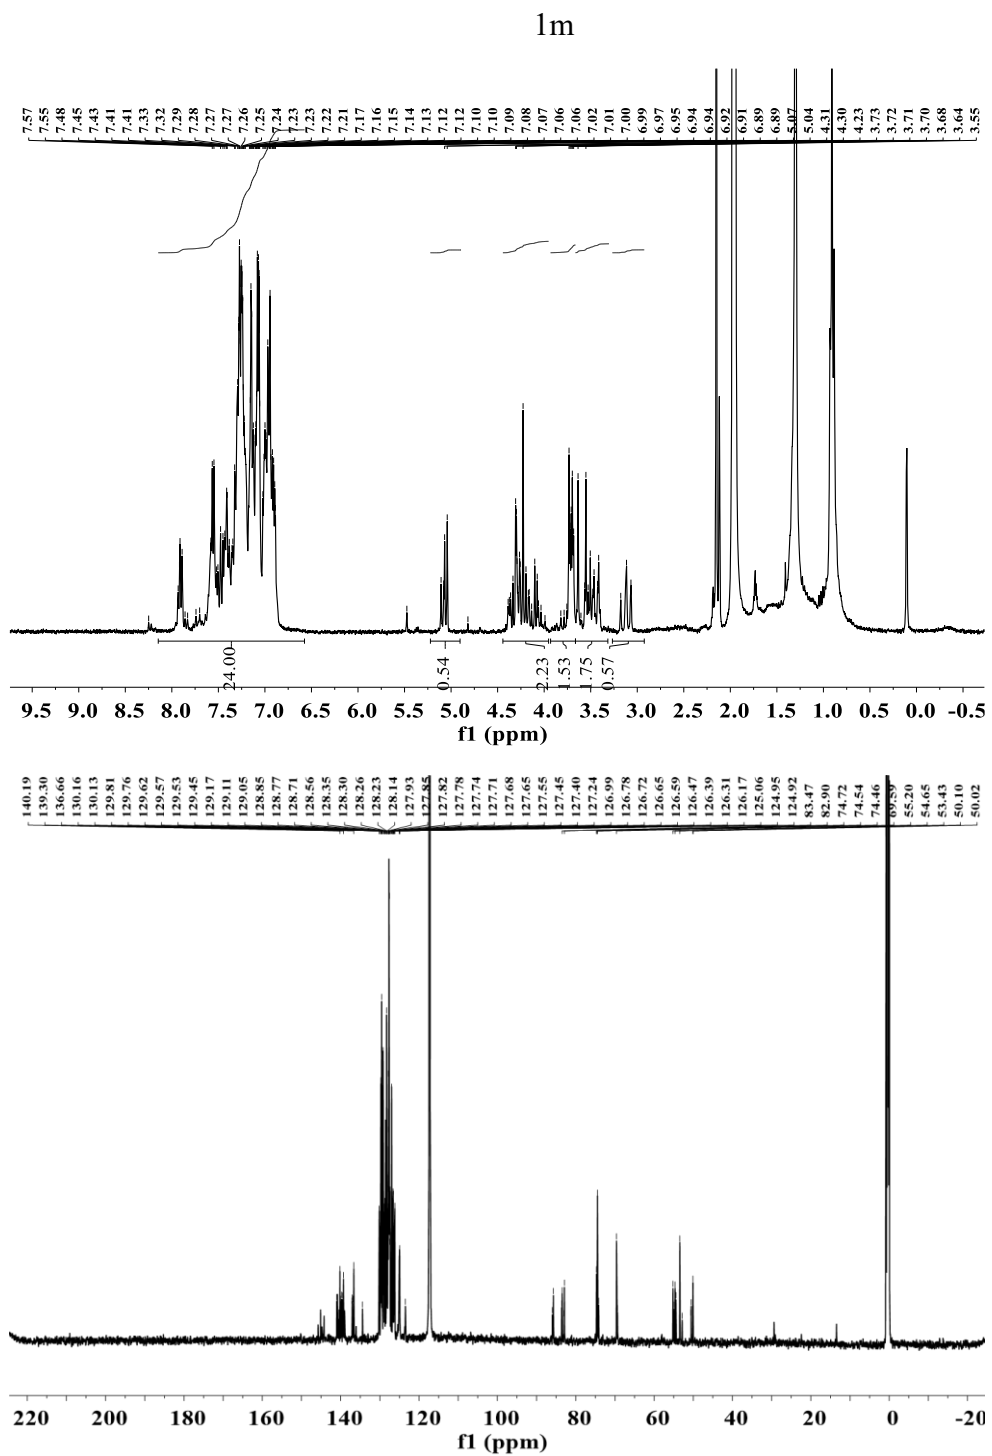

1n

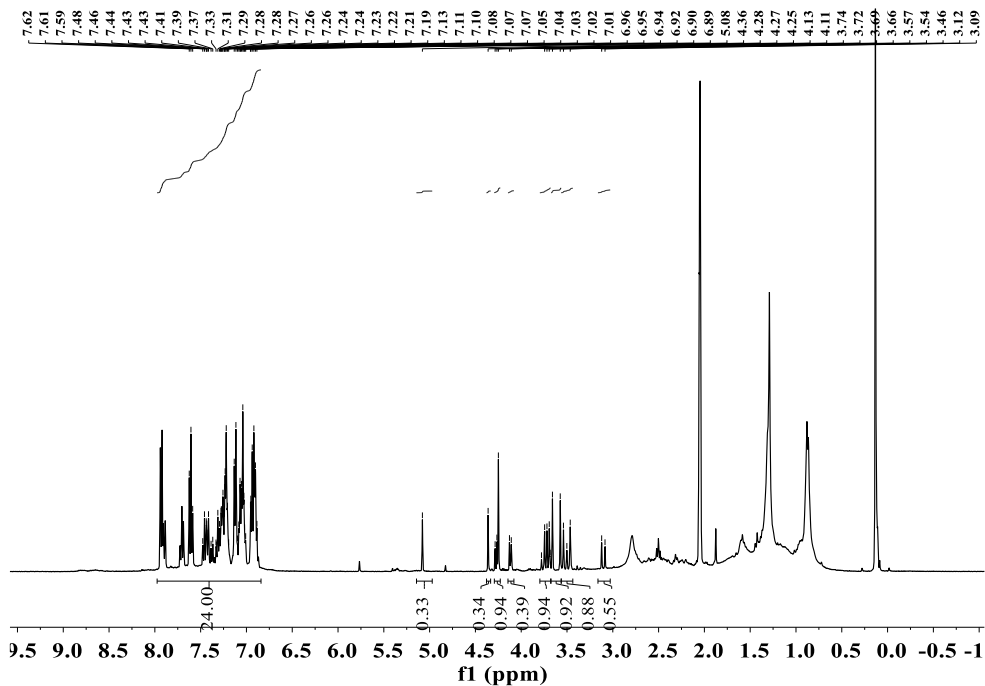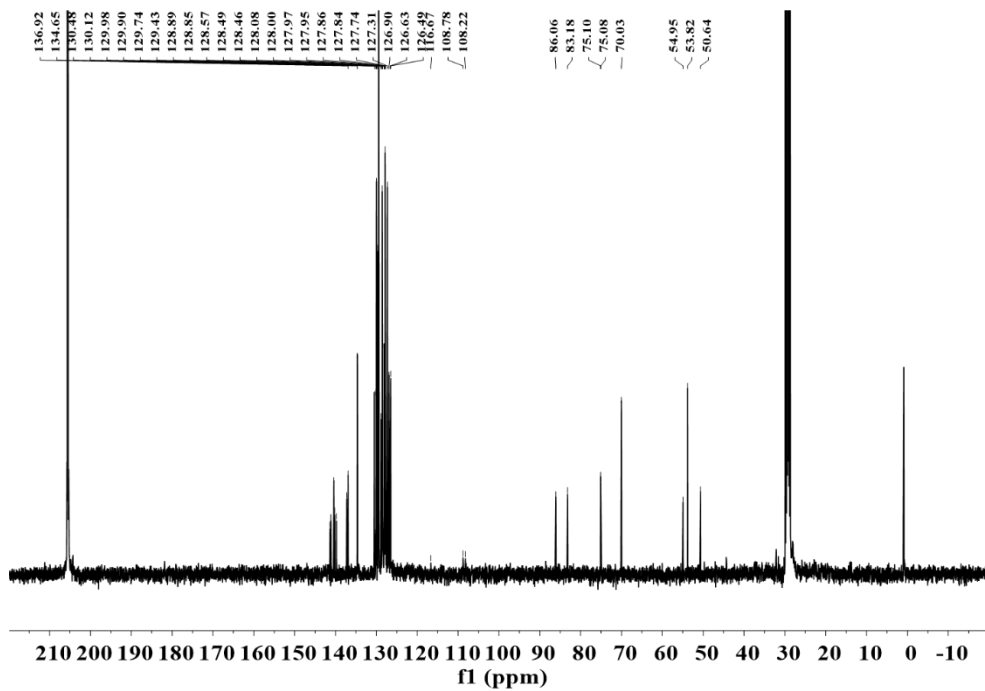

1o

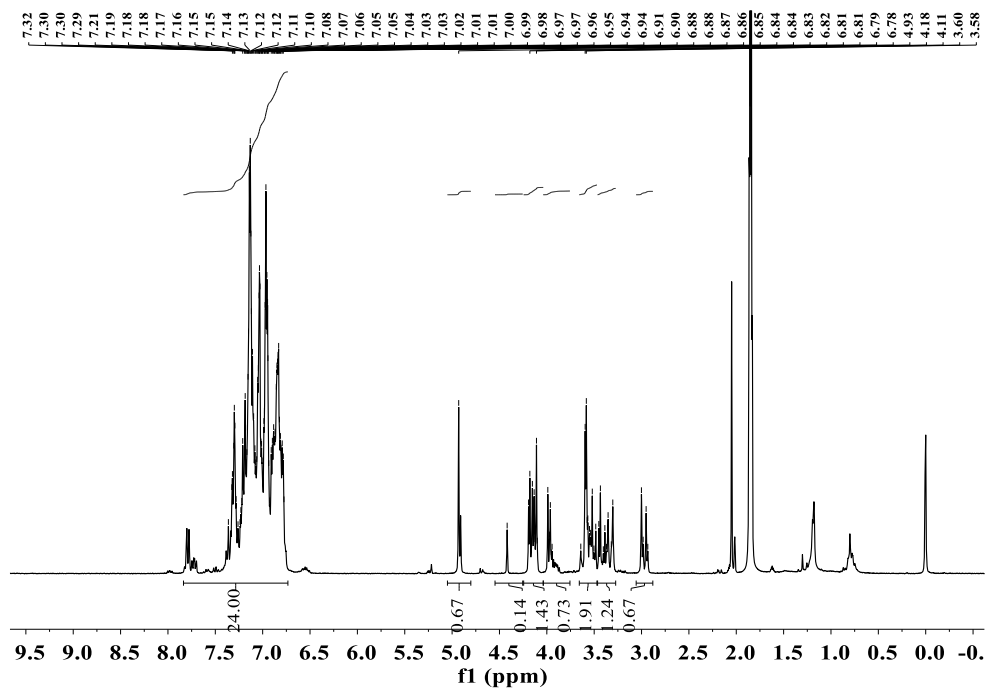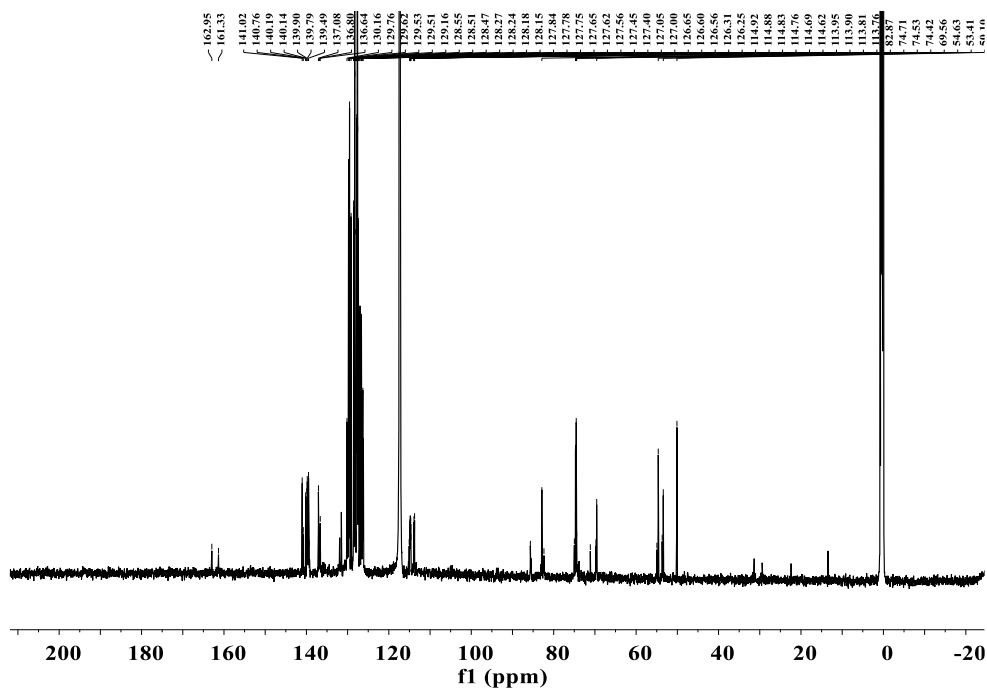

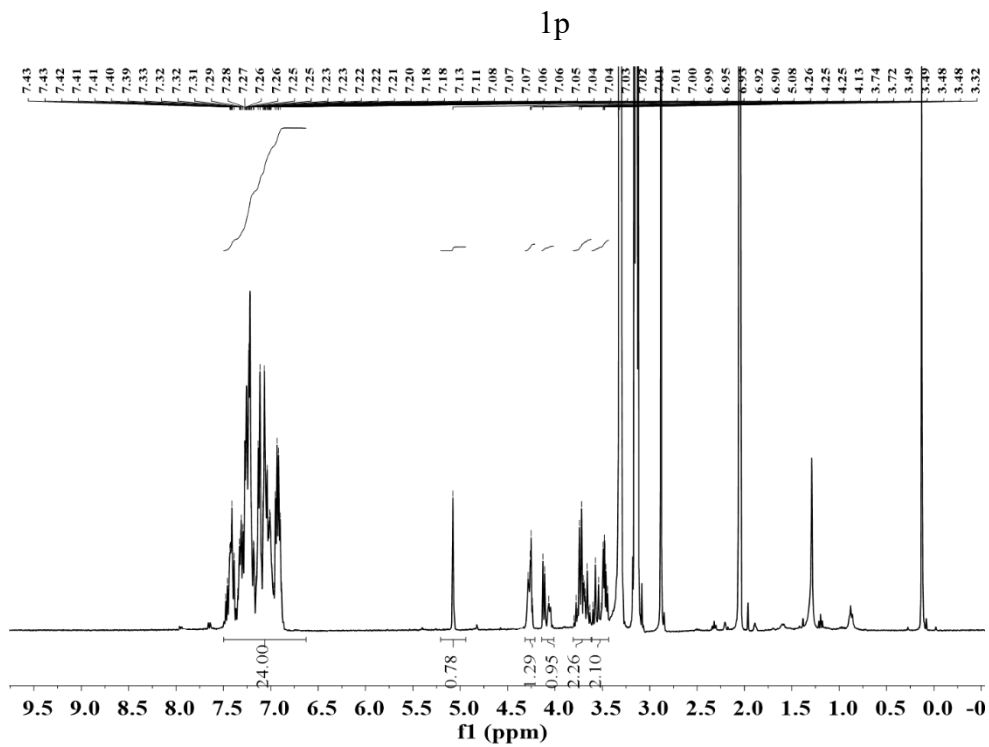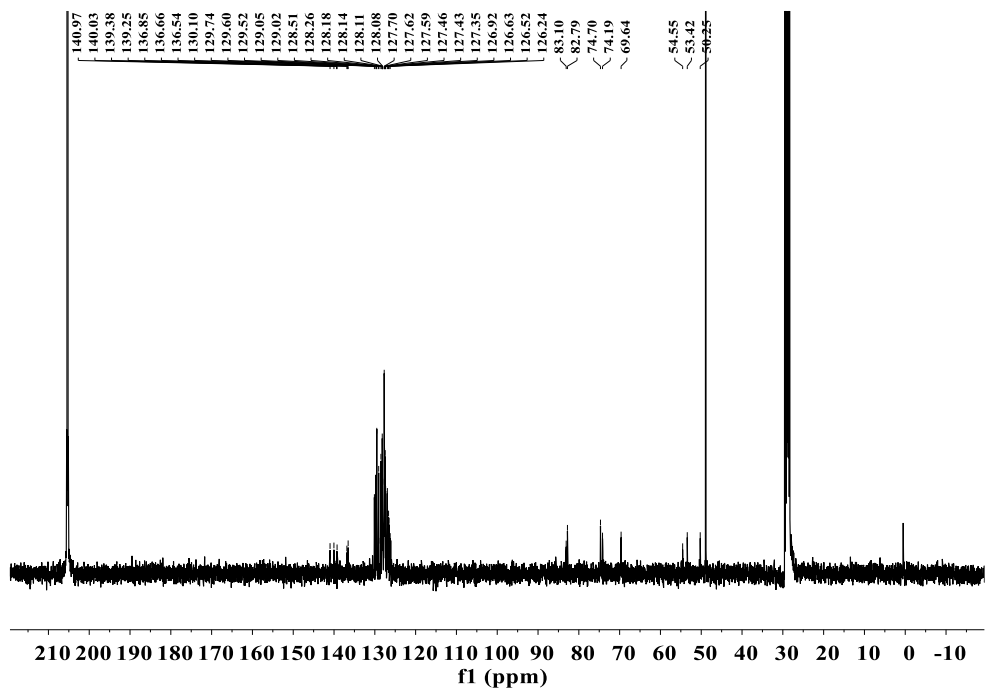

1q

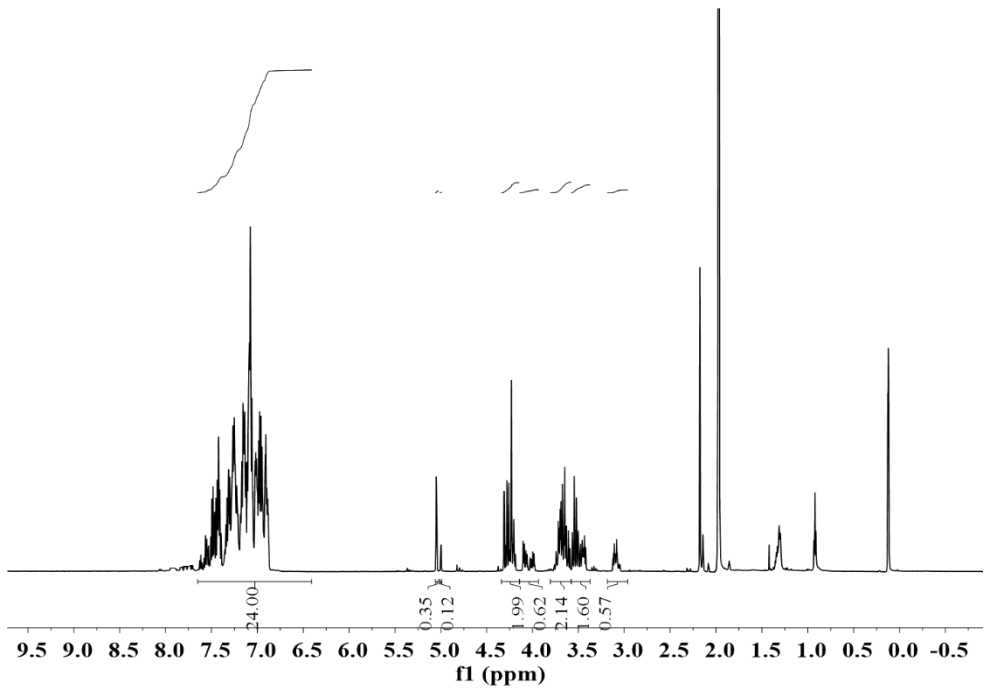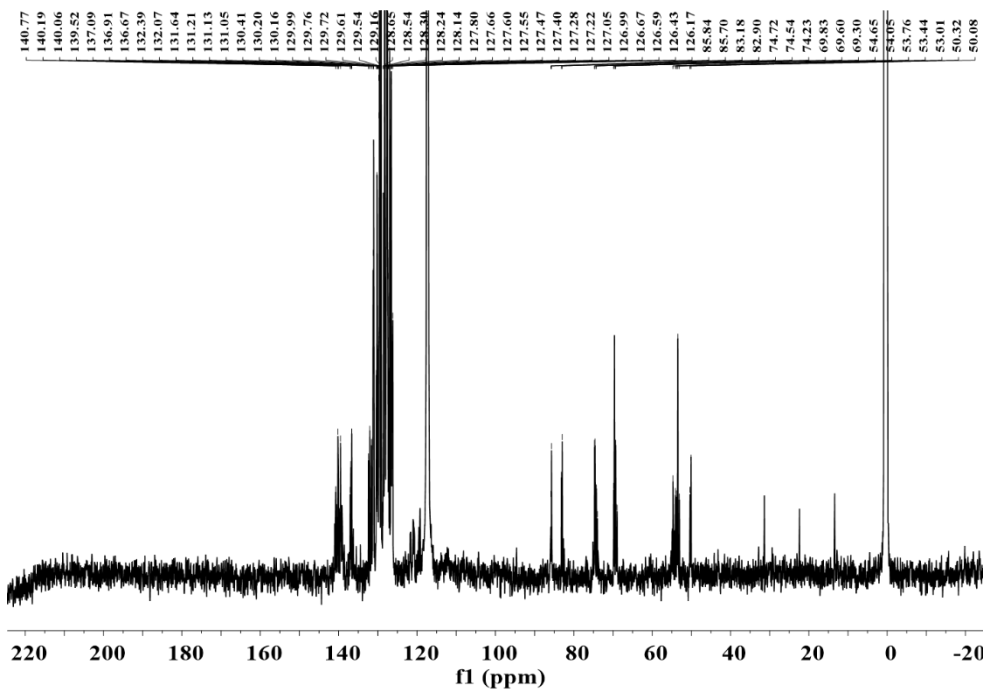

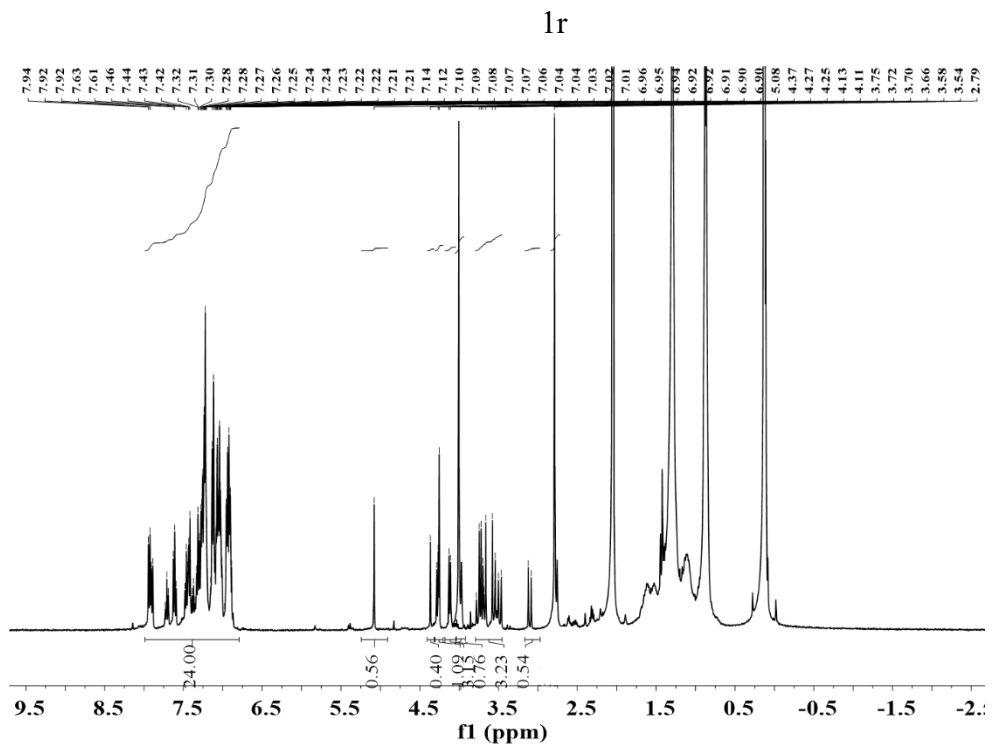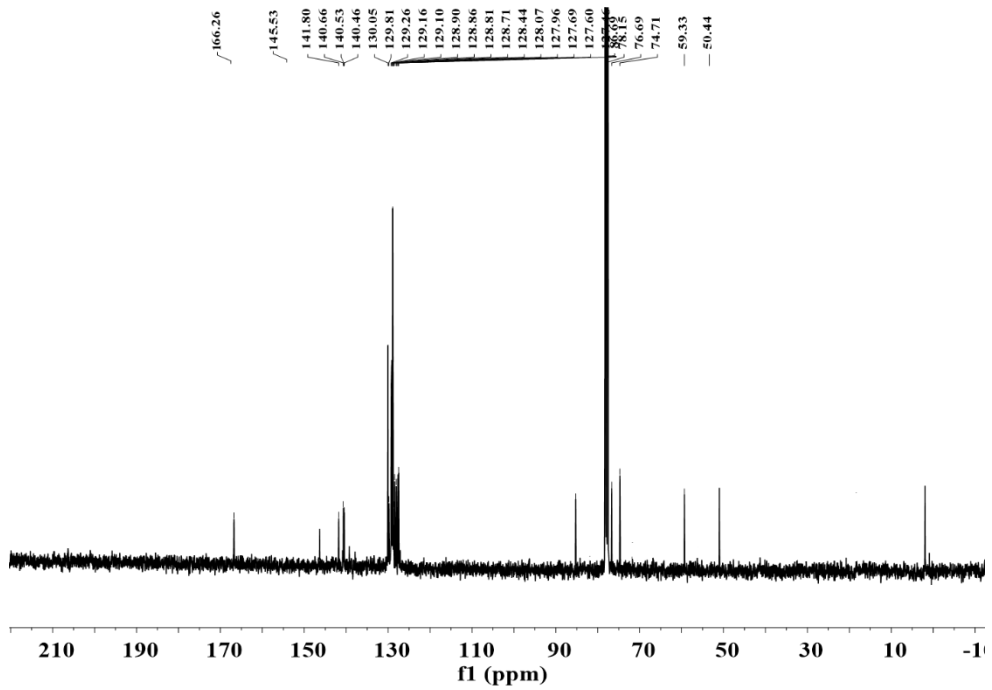

1s

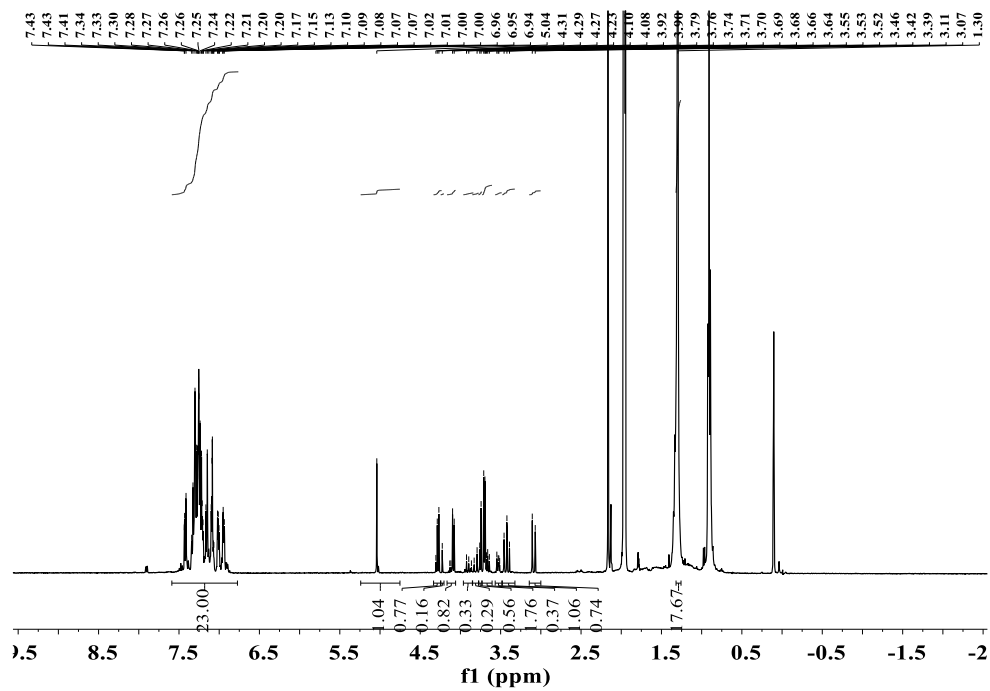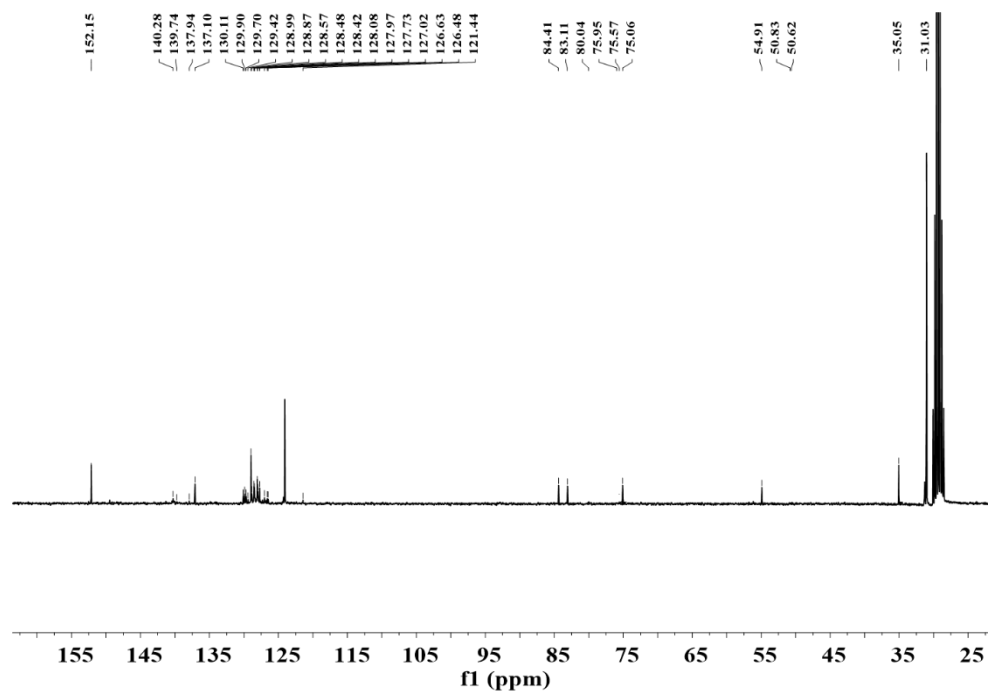



1t

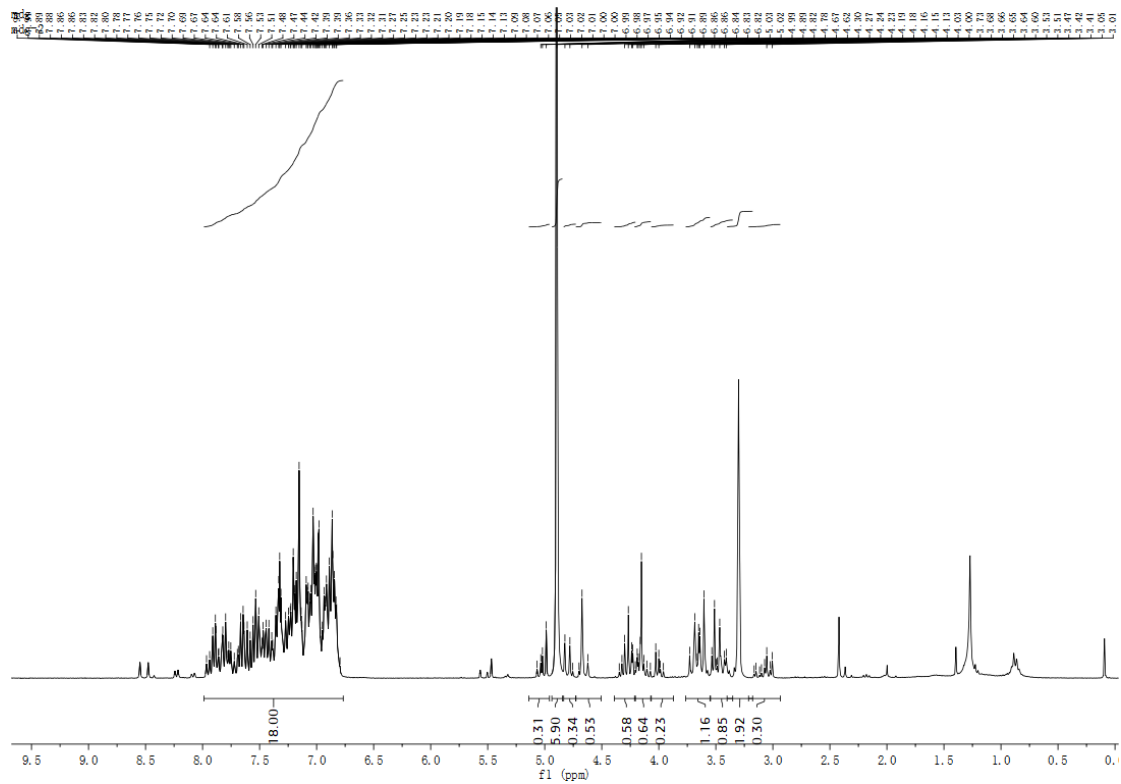

1u

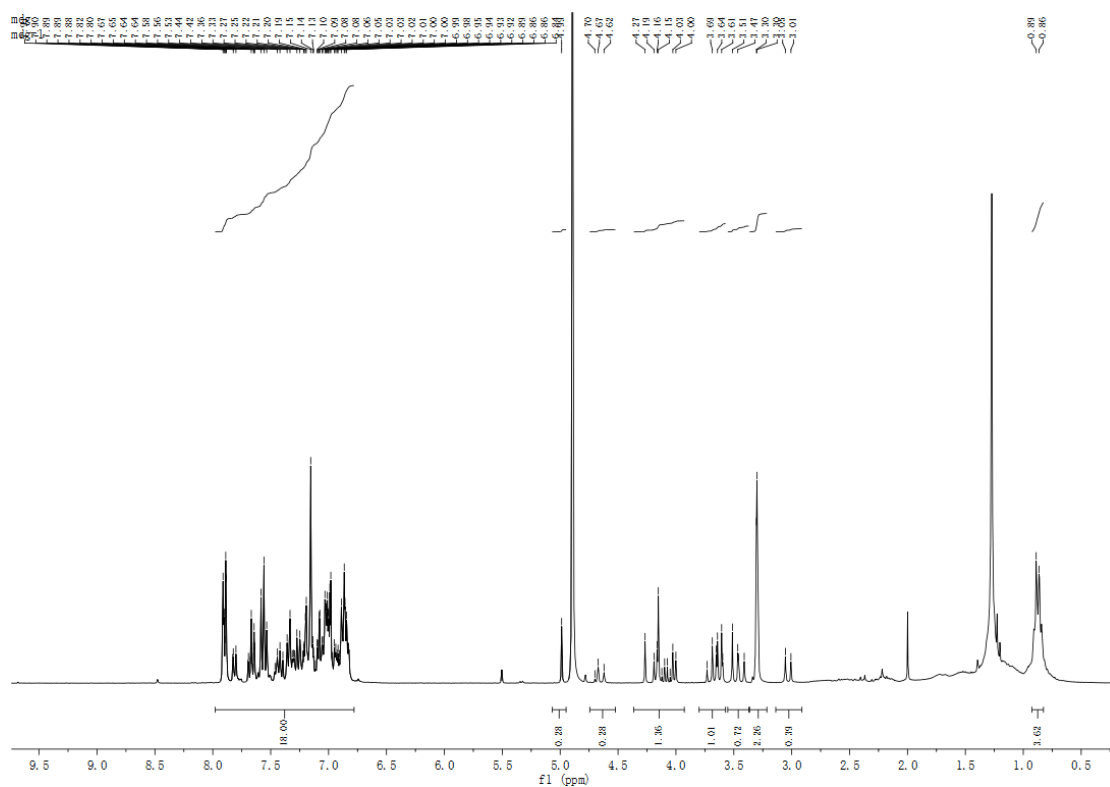

3c

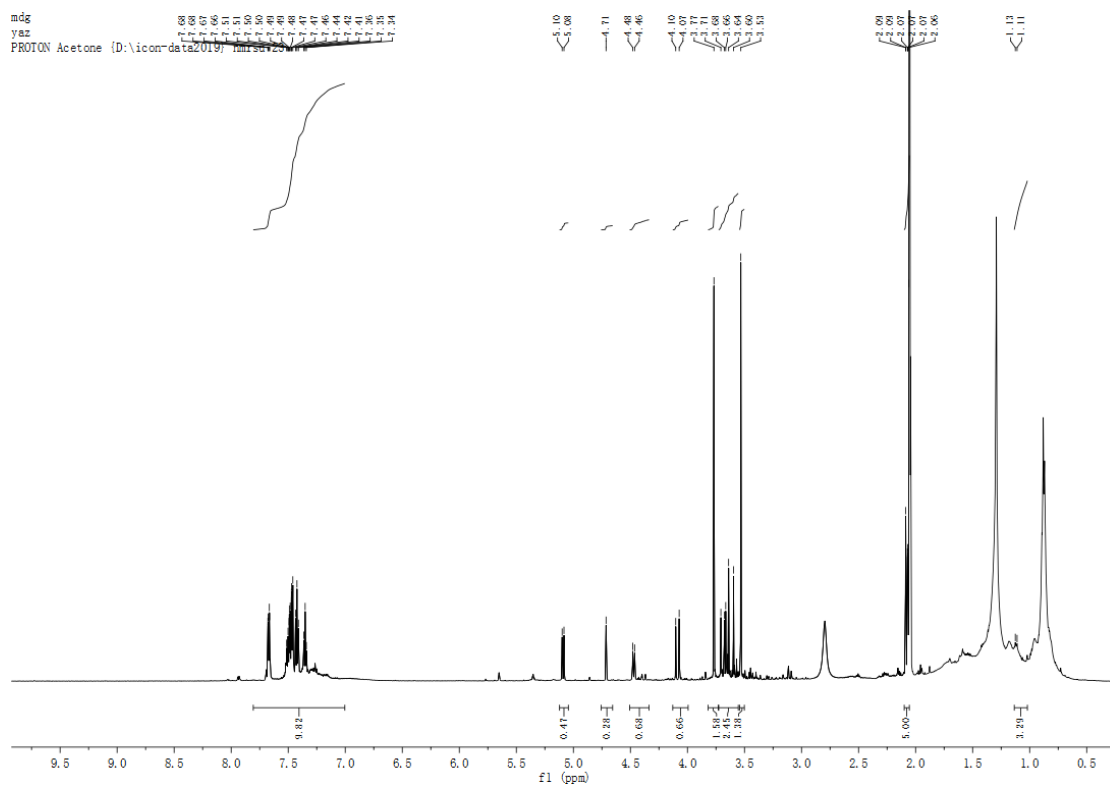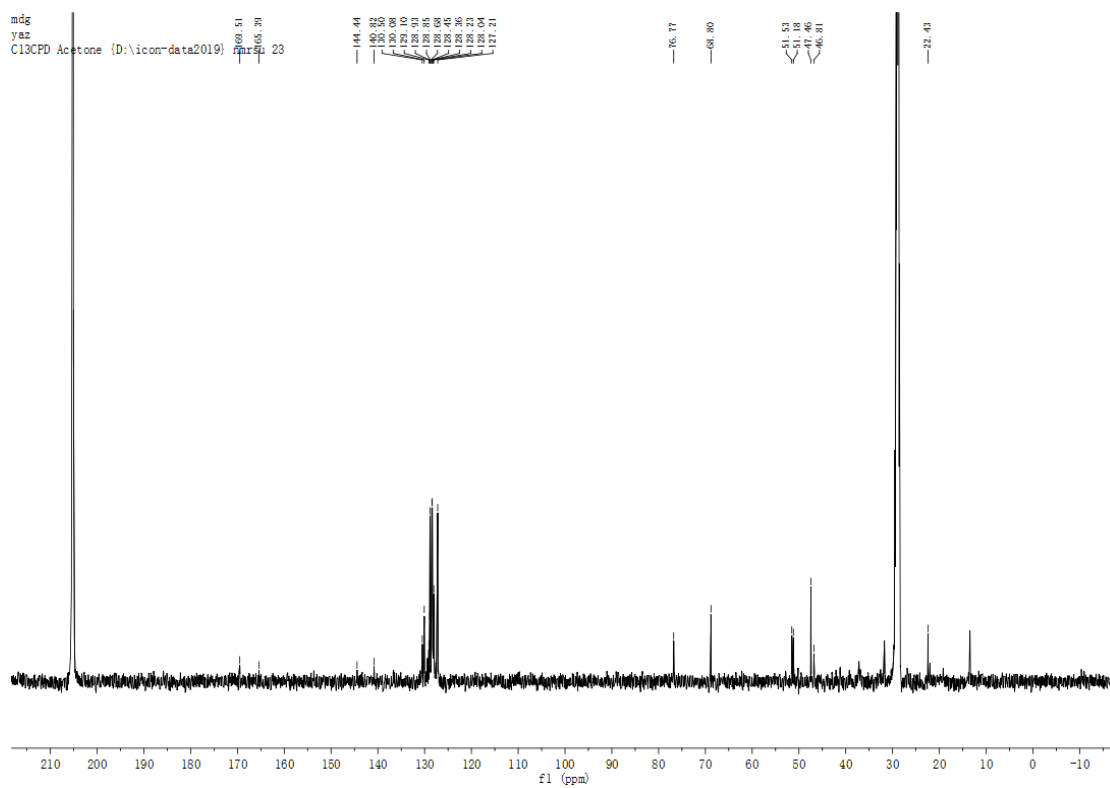

## X. X-ray crystallographic data

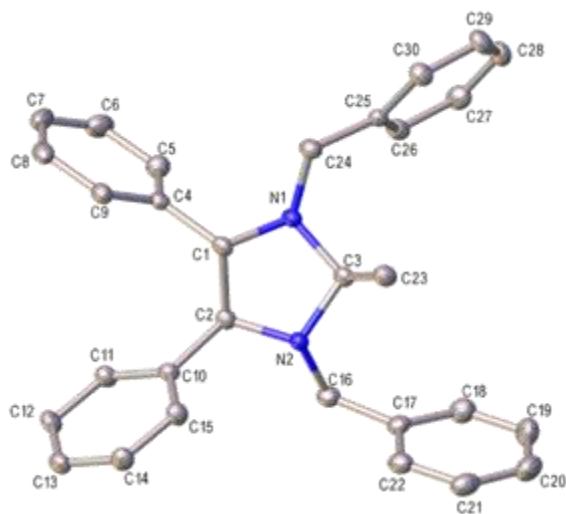

### 1b 1,3-dibenzyl-2-methyl-4,5-diphenylimidazolidine

Table 1. Crystal data and structure refinement for 1b

|                                 |                                                |                 |
|---------------------------------|------------------------------------------------|-----------------|
| Identification code             | CCDC-1856874                                   |                 |
| Empirical formula               | C <sub>30</sub> H <sub>30</sub> N <sub>2</sub> |                 |
| Formula weight                  | 418.56                                         |                 |
| Temperature                     | 173(2) K                                       |                 |
| Wavelength                      | 0.71073 Å                                      |                 |
| Crystal system                  | Monoclinic                                     |                 |
| Space group                     | P 1 21/c 1                                     |                 |
| Unit cell dimensions            | a = 31.342(6) Å                                | α = 90°.        |
|                                 | b = 5.8152(12) Å                               | β = 115.20(3)°. |
|                                 | c = 29.181(6) Å                                | γ = 90°.        |
| Volume                          | 4812(2) Å <sup>3</sup>                         |                 |
| Z                               | 8                                              |                 |
| Density (calculated)            | 1.155 Mg/m <sup>3</sup>                        |                 |
| Absorption coefficient          | 0.067 mm <sup>-1</sup>                         |                 |
| F(000)                          | 1792                                           |                 |
| Theta range for data collection | 0.718 to 25.200°.                              |                 |
| Index ranges                    | -37<=h<=37, -6<=k<=6, -34<=l<=34               |                 |
| Reflections collected           | 30619                                          |                 |
| Independent reflections         | 8616 [R(int) = 0.0786]                         |                 |
| Completeness to theta = 25.200° | 99.7 %                                         |                 |
| Absorption correction           | Semi-empirical from equivalents                |                 |
| Max. and min. transmission      | 1.0000 and 0.6336                              |                 |

|                                   |                                             |
|-----------------------------------|---------------------------------------------|
| Refinement method                 | Full-matrix least-squares on F <sup>2</sup> |
| Data / restraints / parameters    | 8616 / 0 / 579                              |
| Goodness-of-fit on F <sup>2</sup> | 1.269                                       |
| Final R indices [I>2sigma(I)]     | R1 = 0.1039, wR2 = 0.1495                   |
| R indices (all data)              | R1 = 0.1335, wR2 = 0.1605                   |
| Extinction coefficient            | n/a                                         |
| Largest diff. peak and hole       | 0.201 and -0.208 e.Å <sup>-3</sup>          |
